# Supplementary material
Source: PubMed Central journal article supplement (PMC3375212)

**Entry for the Table of Contents** (Please choose one layout)

Layout 2:

**"Click" to Fold**

Ting-Bin Yu, Jane Z. Bai and Zhibin Guan\*

\_\_\_\_\_ Page – Page

"Click" to Fold: Cycloaddition-Induced Self-Assembly of a Polymer into Well-Defined  $\beta$ -Sheets and Hierarchical Nanofibrils

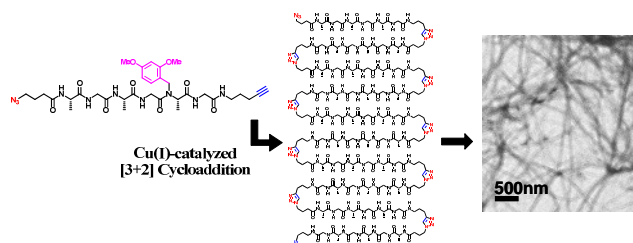

Cu(I)-catalyzed azide–alkyne cycloaddition polymerization of a peptide monomer induced folding of the formed polymer into well-defined  $\beta$ -sheets which further self assemble into hierarchical nanofibrils. The antiparallel  $\beta$ -sheet structure was confirmed by FTIR, CD and powder X-ray diffraction. TEM and AFM micrographs prove the formation of hierarchical amyloid-like nanofibrils.

**“Click” to Fold: Cycloaddition-Promoted Self-Assembly of a Polymer into Well-Defined  
 $\beta$ -Sheets and Hierarchical Nanofibrils**

*Ting-Bin Yu, Jane Z. Bai, Zhibin Guan\**

Department of Chemistry, University of California, 1102 Natural Sciences 2,  
Irvine, California 92697-2025

**Supporting Information**

|       |                                                                    |     |
|-------|--------------------------------------------------------------------|-----|
| I.    | General Information -----                                          | S2  |
| II.   | Synthesis and characterization -----                               | S3  |
| III.  | <sup>1</sup> H NMR spectra of polymers <b>7</b> and <b>8</b> ----- | S10 |
| IV.   | Circular Dichroism (CD) measurements -----                         | S11 |
| V.    | FTIR characterization of polymer <b>7</b> and <b>8</b> -----       | S12 |
| VI.   | Transmission Electron Microscopy (TEM) analysis-----               | S13 |
| VII.  | Atomic Force Microscopy (AFM) analysis -----                       | S15 |
| VIII. | Wide Angle X-Ray Diffraction (WXR) analysis -----                  | S17 |
| IX.   | References -----                                                   | S19 |
| X.    | NMR and FTIR Spectra -----                                         | S20 |

## I. General Information.

<sup>1</sup>H NMR spectra were taken on 500MHz and 600MHz Bruker instruments. NMR chemical shifts were reported as  $\delta$  values in ppm relative to TMS or deuterated solvent: CDCl<sub>3</sub> (7.27), DMSO-*d*<sub>6</sub> (2.50), D<sub>2</sub>O (4.80), CD<sub>3</sub>OD (4.78, 3.31). Data are presented as follows: chemical shift, multiplicity (s = singlet, d = doublet, t = triplet, q = quartet, m = multiplet), integration and coupling constant(s) in Hz. Multiplets were reported over the range (in ppm) it appeared. <sup>13</sup>C NMR spectra were taken on 125MHz and 150MHz Bruker instruments. Carbon NMR data were recorded relative to the following solvent signals: CDCl<sub>3</sub> (77.0), DMSO-*d*<sub>6</sub> (39.51), CD<sub>3</sub>OD (49.15). All solvents used in reactions were from alumina filtration system. Moisture sensitive reactions were performed under nitrogen atmosphere using flame-dried glassware and standard syringe/septa techniques. Extraction solvents were commercial grade. Flash Chromatography was performed using forced flow of the indicated solvent systems over Fisher silica gel (230 - 400 mesh). All glassware was flame dried before use, and reactions were carried out under nitrogen atmosphere. All buffer solutions were corrected by pH-meter. Infrared (IR) spectra were recorded on a MIDAC Grams/Prospect FT-IR spectrometer using a KBr pellet. Circular dichroism spectroscopy was performed on a Jasco J-810 spectropolarimeter (band width: 1nm, response: 1sec., sensitivity: standard, 1 range: 250-190 nm, data pitch: 0.5 nm, scanning speed: 20 nm/min., accumulation: 5). Mass spectral data (both ES/MS and HRMS) was obtained on a Micromass auto spec spectrometer. MALDI-TOF data was obtained on Applied Biosystems Voyage-DE STR. Gel Permeation Chromatography (GPC) was carried out using an Agilent 1100 Series GPC-SEC Analysis System along with a mixed bed Plgel Mixed-C column from Polymer Labs. The eluent was DMF with 0.1% LiBr and a flow rate of 1.0 mL / min was used. The calibration was performed using poly(ethylene glycol) (PEG)-based molecular weight standards. HPLC analysis was performed using Rainin SD-200 solvent delivery system, UV-1 detector unit and Zobax-80SB C18 reversed phase analytical column (manufactured by Agilent n Varian). The typical flow rate for the analytical analysis was 1 mL/min. In all cases, water and acetonitrile buffers were used with 0.1% TFA. All other chemicals were purchased from Aldrich, ACROS, Novabiochem, or TCI and used without further purification.

## II. Synthesis and Characterization

### Experimental details of the solid phase synthesis:

The peptides **5** (Scheme S1) were synthesized by solid phase peptide synthesis (SPPS) following standard Fmoc protocol<sup>1</sup> on 2-chlorotrityl chloride resin using 2-(1H-benzotriazole-1-yl)-1,1,3,3-tetramethyluronium hexafluorophosphate (HBTU) and/or O-(7-azabenzotriazol-1-yl)-1,1,3,3-tetramethyluronium hexafluorophosphate (HATU) as coupling reagents. All the peptides were characterized by analytical HPLC method: 5 - 100% CH<sub>3</sub>CN in H<sub>2</sub>O gradient over 20 min at 214 nm, 1 mL/min on Agilent Zobax-80SB C18 column.

### Standard protocol for SPPS on 2-chlorotrityl chloride resin:<sup>1</sup>

In a 250mL round bottom flask, a suspension of 5.00g 2-chlorotrityl chloride resin (loading: 1.27 mmol/g) and 3.0 equiv of Fmoc-Gly-OH (11.33g, 38.1 mmol) in 50 mL DCM were stirred for 1 hour, followed by addition of 5.0 equiv of *N,N*-diisopropylethylamine (DIPEA). The mixture was stirred for 3 hours at room temperature. The resin was filtered in a solid-phase synthesis reaction vessel and washed with DMF (5 x 50 mL), DCM (5 x 50 mL) and NMP (5 x 50 mL). The resin was then added with capping reagent (DIPEA/MeOH/DCM = 1/2/17) and agitated with N<sub>2</sub> gas for 1 hour. the solution was drained and the resin was washed with DMF (5 x 50 mL), DCM (5 x 50 mL). A preactivated solution of Fmoc-amino acid (50.8 mmol), HBTU (50.8 mmol) and DIPEA (76.2 mmol) in 20 ml NMP was added into the resin for the subsequent couplings. The reaction mixture was agitated with N<sub>2</sub> for 2 hours. The solution was drained and the resin was then washed with DMF (5 x 50 mL), DCM (5 x 50 mL). All the reactions were monitored by the Kaiser test. The Fmoc protecting group was removed with 50 mL of 20% piperidine in NMP twice. The mixture was agitated for 30 minutes, the solution was drained, and the resin was washed with 3 x 50 mL of DMF and 3 x 50 mL of CH<sub>2</sub>Cl<sub>2</sub>.

After all amino acids were coupled, the resin was treated with a solution containing 10% TFE, 10% AcOH, and 80% DCM for 3 hours at room temperature. The cleavage solution was then transferred to a round bottle flask with hexane and then concentrated in vacuo. Cold ether was added subsequently and white powder precipitated out immediately. The peptide was used without any purification.

### Scheme S1. The Synthesis of monomer **6**.

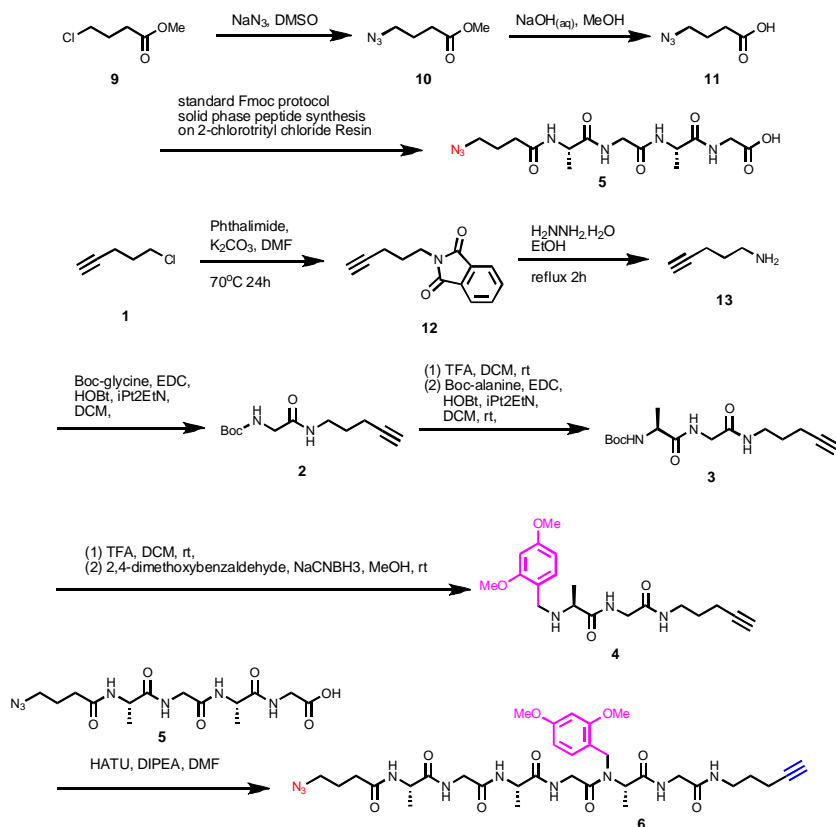

Compounds **10**, **11**, **12**, **13** were prepared according to the literature procedure.<sup>2,3</sup> Their structures were confirmed by <sup>1</sup>H, <sup>13</sup>C NMR and mass spectrometry, respectively.

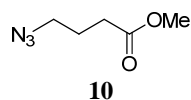

**(10) Methyl 4-azidobutyrate.** Methyl 4-chlorobutyrate (34.25g, 250 mmole) and sodium azide (22.5g, 346 mmole) were dissolved in DMSO (115 mL) in a 500mL round bottom flask. The mixture solution was heated to 45°C and stirred for 24h. After the mixture was cooled down to room temperature, 200 mL water was added and the mixture was extracted with Et<sub>2</sub>O (3 x 100 ml). The combined organic layer was dried over anhydrous MgSO<sub>4</sub>, filtered, and concentrated on a rotary evaporator to give **10** as colorless liquid (35.34g, 99%). <sup>1</sup>H NMR (500 MHz, CDCl<sub>3</sub>) δ 3.60 (s, 2H), 3.36 (t, *J* = 6.8, 2H), 2.38 (t, *J* = 7.2, 2H), 1.81-1.75 (m, 2H); <sup>13</sup>C NMR (125MHz, CDCl<sub>3</sub>) δ 172.7, 51.4, 49.9, 30.4, 23.8; MS (ESI), *m/z* calcd for [C<sub>5</sub>H<sub>9</sub>N<sub>3</sub>O<sub>2</sub> + H]<sup>+</sup> = 144.1; found 144.1.

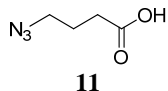

**(11) 4-Azidobutyric acid.** In a 500 mL flask compound **10** (33.1g 231 mmol) was dissolved in 2N NaOH (461 mL, 2.0eq) solution. A small amount of MeOH was added slowly to make it a homogeneous solution. The mixture was stirred at room temperature for 48 hours, then MeOH was removed under vacuo. The aqueous layer was washed with Et<sub>2</sub>O (4 x 50 mL), then acidified with conc. HCl to pH 1. The compound was extracted with Et<sub>2</sub>O (4 x 100 ml), and the combined organic fractions were dried over anhydrous MgSO<sub>4</sub>, filtered, and concentrated on a rotary evaporator to give **11** as transparent colorless liquid (28.74g, 96%). <sup>1</sup>H NMR (500 MHz, CDCl<sub>3</sub>) δ 10.72 (s, 1H), 3.36 (t, *J* = 6.4, 2H), 2.4 (t, *J* = 7.2, 2H), 1.92-1.86 (m, 2H); <sup>13</sup>C NMR (125MHz, CDCl<sub>3</sub>) δ 179.2, 50.4, 30.8, 23.8; MS (ESI), *m/z* calcd for [C<sub>4</sub>H<sub>7</sub>N<sub>3</sub>O<sub>2</sub> + H]<sup>+</sup> = 130.1; found 130.1.

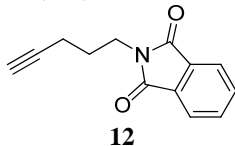

**(12) 1-Phthalimido-4-pentyne.** In a 250 mL flask, 5-chloro-1-pentyne (5.13g, 50 mmol), phthalimide (8.83g, 60 mmol), K<sub>2</sub>CO<sub>3</sub>(5.13g, 50 mmol) and KI (100mg) were suspended in DMF (50 mL). The mixture solution was heated at 70°C for 16 hours. Then the solution was cooled down to room temperature and 50mL H<sub>2</sub>O was added into solution. The mixture was extracted by Et<sub>2</sub>O (200 mL x 4) and the combined organic layer was dried over anhydrous MgSO<sub>4</sub>, filtered, and concentrated on a rotary evaporator. The crude residue was further purified by flash chromatography (DCM) to give **12** as white solid (10.24g, 96%). <sup>1</sup>H NMR (500 MHz, CDCl<sub>3</sub>) δ 7.88-7.84 (m, 2H), 7.74-7.71 (m, 2H), 3.81 (t, *J* = 7.5, 2H), 2.28 (td, *J* = 7.0, 2.5, 2H), 1.97-1.92 (m, 3H); <sup>13</sup>C NMR (125MHz, CDCl<sub>3</sub>) δ 168.3, 133.9, 132.1, 82.9, 69.0, 37.1, 27.2, 16.2; MS (ESI), *m/z* calcd for [C<sub>13</sub>H<sub>11</sub>NO<sub>2</sub> + H]<sup>+</sup> = 214.1; found 214.1.

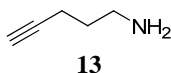

**(13) 1-Amino-4-pentyne.** In a 250 mL flask was added **12** (7.40g, 34.7 mmol) in EtOH (70 ml) to give a white suspension. Then hydrazine monohydrate was added into solution to give a clean solution. The reaction mixture was heated at 70°C under stirring for 2 hours, during which time much white solid precipitated. After the mixture solution was cooled down to room temperature, 50 mL H<sub>2</sub>O was added into solution followed by addition of 2N HCl to adjust its pH to 3.5. The precipitate was filtered and the filtrate was concentrated using a rotary evaporator. The residue was cooled down to 0°C and treated with aq. NaOH (10N, 30 mL). Then the aqueous solution was extracted with DCM (3 x 100 mL). The combined organic layer was dried over anhydrous MgSO<sub>4</sub>, filtered, and concentrated on a rotary evaporator to give **13** as green oil (2.16g, 74%). <sup>1</sup>H NMR (500 MHz, CDCl<sub>3</sub>) δ 2.77 (t, *J* = 7.0, 2H), 2.22 (td, *J* = 7.0, 2.7, 2H), 1.92 (t, *J* = 2.7, 1H), 1.83 (s, 2H), 1.66-1.62 (m, 2H); <sup>13</sup>C NMR (125MHz, CDCl<sub>3</sub>) δ 83.7, 68.6, 40.7, 31.6, 15.7.

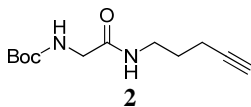

**(2) Tert-butyl [2-oxo-2-(pent-4-yn-1-ylamino)ethyl]carbamate.** Compound **13** (1.58g, 19.0 mmol) and Boc-Gly-OH (2.28g, 13.0 mmol) were dissolved in 100 mL DCM containing 4.56 mL DIPEA, into which EDC (3.64g, 19.0 mmol) and HOBT (2.57g, 19.0 mmol) were added. The mixture was stirred at room temperature for 12 hours. Then 100 mL of H<sub>2</sub>O and 250 mL of EtOAc were added into mixture solution. The combined organic layer was washed with H<sub>2</sub>O (100 mL × 1), 1M HCl (100

mL  $\times$  1), sat. NaHCO<sub>3</sub> (100 mL  $\times$  1), and brine, and then dried over anhydrous MgSO<sub>4</sub>, filtered, and concentrated on a rotary evaporator to give **2** as white solid (3.06g, 98%). <sup>1</sup>H NMR (500 MHz, CDCl<sub>3</sub>)  $\delta$  6.51 (s, 1H), 5.27 (s, 1H), 3.77 (d, *J* = 6.3, 2H), 3.39 (q, *J* = 6.3, 2H), 2.26-2.23 (m, 2H), 1.99 (s, 1H), 1.76-1.73 (m, 2H), 1.45 (s, 3H); <sup>13</sup>C NMR (125MHz, CDCl<sub>3</sub>)  $\delta$  169.5, 156.1, 83.4, 80.3, 69.2, 44.4, 38.6, 28.3, 27.9, 16.0; HRMS (ESI), *m/z* calcd for [C<sub>12</sub>H<sub>20</sub>N<sub>2</sub>O<sub>3</sub> + Na]<sup>+</sup> = 263.1372; found 263.1363.

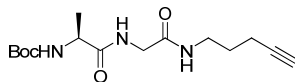

**3**

**(3) Tert-butyl [(2S)-1-oxo-1-[[2-oxo-2-(pent-4-yn-1-ylamino)ethyl]amino]propan-2-yl]carbamate.** In a 250 mL flask was added **2** (4.90g, 20.39 mmol) in a TFA/DCM solution (15 mL/10 mL). After stirring the solution at room temperature for 3 hours, TFA/DCM was removed under vacuum. The residue was dissolved in DCM and further evaporated in vacuo. The residue was dried under vacuum for 1 hour. Then the residue and Boc-Alanine were dissolved in DCM (50 mL) and cooled down in a ice bath. DIPEA was added into solution. EDC and HOBt were added into solution subsequently. The mixture was stirred at room temperature for 12 hours. Then 100 mL of H<sub>2</sub>O and 250 mL of EtOAc were added into mixture solution. The combined organic layer was washed with H<sub>2</sub>O (100 mL  $\times$  1), 1M HCl (100 mL  $\times$  1), sat. NaHCO<sub>3</sub> (100 mL  $\times$  1), and brine, and then dried over anhydrous MgSO<sub>4</sub>, filtered, and concentrated on a rotary evaporator. The residue was purified by flash chromatography (MeOH/DCM=1:9) to give **3** as white solid (5.70g, 90%). <sup>1</sup>H NMR (500 MHz, DMSO-*d*<sub>6</sub>)  $\delta$  8.10 (s, 1H), 7.67 (s, 1H), 7.11 (d, *J* = 6.5, 1H), 6.51 (s, 1H), 6.47 (d, *J* = 8.5, 1H), 3.92-3.90 (m, 1H), 3.68-3.58 (qd, *J* = 16.4, 5.9, 2H), 3.18-3.06 (m, 2H), 2.78 (s, 1H), 2.17-2.13 (m, 2H), 1.60-1.56 (p, *J* = 7.0, 2H), 1.39 (s, 9H), 1.16 (d, *J* = 7.0, 3H); <sup>13</sup>C NMR (125MHz, CDCl<sub>3</sub>)  $\delta$  173.2, 168.9, 155.9, 83.4, 80.6, 69.0, 50.94, 43.2, 28.3, 28.0, 17.9, 16.0; HRMS (ESI), *m/z* calcd for [C<sub>15</sub>H<sub>25</sub>N<sub>3</sub>O<sub>4</sub> + Na]<sup>+</sup> = 334.1743; found 334.1742.

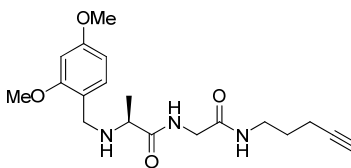

**4**

**(4) (S)-2-(2,4-dimethoxybenzylamino)-N-(2-oxo-2-(pent-4-ynylamino)ethyl) propanamide.** In a 100 mL flask, **3** (0.62g, 2.0 mmol) was dissolved in 20 mL TFA/DCM (1:1). The mixture was stirred at room temperature for 2 hours and then the solution concentrated on a rotary evaporator. The residue was added with 2,4-dimethoxybenzaldehyde (0.33g, 2.0 mmol), 0.35mL Et<sub>3</sub>N and 10 mL MeOH. Then the mixture was added with NaCNBH<sub>3</sub> (0.15g, 2.4 mmol). The mixture was stirred at room temperature for 48 hours. Then the solution was concentrated on a rotary evaporator. The residue was purified by flash chromatography with EtOAc to give yellow gel-like product 0.60g (1.66 mmol, 83 %) of **4**. <sup>1</sup>H NMR (500 MHz, DMSO-*d*<sub>6</sub>)  $\delta$  8.07 (s, 1H), 7.87 (s, 1H), 7.18 (d, *J* = 8.5, 1H), 6.51 (s, 1H), 6.47 (d, *J* = 8.5, 1H), 3.74 (d, *J* = 7.0, 4H), 3.70 (d, *J* = 5.5, 2H), 3.55 (q, *J* = 16.4, 2H), 3.13-3.10 (m, 3H), 2.78 (s, 1H), 2.17-2.15 (m, 2H), 1.59-1.56 (m, 2H), 1.14 (d, *J* = 7.0, 3H); <sup>13</sup>C NMR (125MHz, DMSO-*d*<sub>6</sub>)  $\delta$  168.5, 160.0, 159.2, 130.3, 104.3, 98.2, 84.0, 71.4, 56.3, 55.4, 55.2, 45.2, 41.8, 28.1, 18.6, 15.3; HRMS (ESI), *m/z* calcd for [C<sub>19</sub>H<sub>27</sub>N<sub>3</sub>O<sub>4</sub> + H]<sup>+</sup> = 362.2080; found 362.2074.

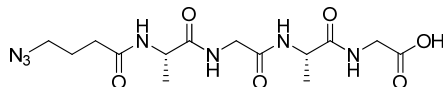

**5**

**(5) (5S,11S)-16-azido-5,11-dimethyl-4,7,10,13-tetraoxo-3,6,9,12-tetraazahexadecan-1-oic acid.** Peptide **5** was synthesized according to the standard solid phase peptide synthesis procedure as described earlier on 2-chlorotrityl chloride resin<sup>1</sup>. Following cleavage from resin, the final product was purified by precipitation in Et<sub>2</sub>O. The yield is 64% according to the initial loading on the resin. <sup>1</sup>H NMR (500 MHz, DMSO-*d*<sub>6</sub>)  $\delta$  8.15 (t, *J* = 6.6, 3H), 7.92 (d, *J* = 7.0, 1H), 4.31-4.20 (m, 2H), 3.76-3.65 (m, 4H), 3.33-3.30 (t, *J* = 6.8, 2H), 2.20 (t, *J* = 7.0, 2H), 1.76-1.70 (m, 2H), 1.20 (t, *J* = 8.8, 6H); <sup>13</sup>C NMR (125MHz, DMSO-*d*<sub>6</sub>)  $\delta$  172.8, 172.4, 171.4, 171.1, 168.4, 50.3, 48.5, 48.0, 42.0, 40.7, 31.9, 31.0, 24.4, 22.1, 18.3, 17.8, 14.0; HRMS (ESI), *m/z* calcd for [C<sub>14</sub>H<sub>23</sub>N<sub>7</sub>O<sub>6</sub> + Na]<sup>+</sup> = 408.1608; found 408.1601.

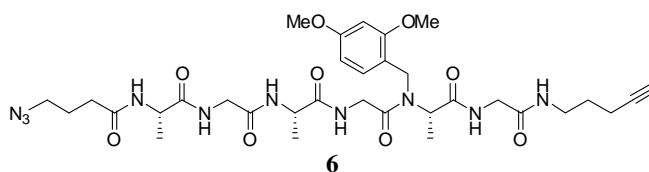

**(6) 4-azido-N-((2S,8S,14S)-13-(2,4-dimethoxybenzyl)-8,14-dimethyl-3,6,9,12,15,18-hexaoxo-4,7,10,13,16,19-**

**hexaazatetracos-23-yn-2-yl)butanamide.** In a 250 mL round bottom flask, **4** (0.365g, 1.01 mmol) and peptide **5** (0.39g, 1.01 mmol) were dissolved in 15 mL a DMF:DMSO (95:5) mixed solvent containing 0.265 mL DIPEA. Following addition of HATU (0.461g, 1.2 mmol), the mixture was stirred at room temperature for 48 hours. After addition of 100 mL of H<sub>2</sub>O to the completed reaction solution, the mixture was extracted with EtOAc (50 mL × 2). The combined organic layer was washed with H<sub>2</sub>O (100 mL × 1), 1M HCl (100 mL × 1), sat. NaHCO<sub>3</sub> (100 mL × 1), and brine, then dried over anhydrous MgSO<sub>4</sub>, filtered, and finally concentrated on a rotary evaporator. The residue was purified by flash chromatography with MeOH/DCM (1:9) to give **6** as white solid (349mg, 46%). <sup>1</sup>H NMR (500 MHz, MeOD-*d*<sub>4</sub>) δ 7.16 (d, *J* = 8.3, 1H), 6.53 (s, 1H), 6.48 (d, *J* = 8.3, 1H), 4.62 (d, *J* = 15.7, 1H), 4.40–4.37 (m, 2H), 4.22 (s, 2H), 4.17 (d, *J* = 7.2, 1H), 4.05 (d, *J* = 7.2, 1H), 3.89–3.58 (m, 10H), 3.43 (q, *J* = 7.0, 1H), 3.32–3.27 (m, 2H), 3.19–3.14 (m, 1H), 2.28 (t, *J* = 7.2, 2H), 2.16–2.10 (m, 3H), 1.86–1.81 (m, 2H), 1.72–1.70 (m, 2H), 1.36–1.10 (m, 9H); <sup>13</sup>C NMR (125MHz, DMSO-*d*<sub>6</sub>) δ 173.3, 172.7, 172.4, 172.0, 171.5, 171.1, 169.9, 169.2, 168.9, 168.6, 161.8, 160.6, 159.2, 158.2, 132.8, 129.3, 117.4, 105.2, 104.9, 98.8, 98.7, 84.6, 84.5, 71.9, 71.8, 56.1, 55.9, 55.8, 55.7, 55.3, 50.7, 39.0, 48.5, 48.5, 45.6, 44.0, 43.0, 42.4, 41.5, 38.1, 32.4, 31.2, 28.5, 24.8, 18.7, 18.2, 17.1, 15.83, 15.77, 15.0; HRMS (ESI), *m/z* calcd for [C<sub>33</sub>H<sub>48</sub>N<sub>10</sub>O<sub>9</sub> + Na]<sup>+</sup> = 751.3503; found 751.3494.

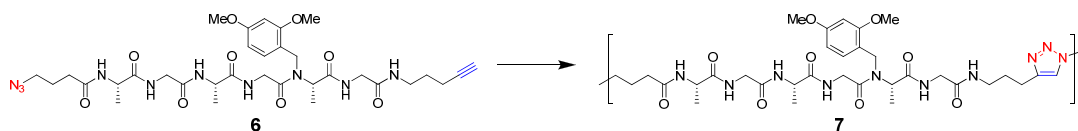

**Procedure for [2+3] cycloaddition polymerization:**

**7** was prepared according to a modified literature procedure.<sup>5</sup> Peptide monomer **6** (182mg, 0.25 mmol), copper acetate (4mg, 0.03 mmol), and 0.25 mL of N<sub>2</sub>-degassed DMF were introduced into a small vial. Under stirring the mixture was heated at 80° C in an oil bath for 2 hours. The initial clear solution was transformed into a dark green gel. After cooling down the polymerization mixture with an ice bath, the gel was dissolved with additional DMF and then polymer was precipitated into 0.1 N HCl (20 mL). The precipitate was purified by consecutive three times of centrifugation and redispersion with 0.1 N HCl. A white solid precipitate was finally isolated and dried under vacuum to give 155mg product **7** (yield: 85%). The number average molecular weight (M<sub>n</sub>) of polymer is 11500 and weight number average molecular weight (M<sub>w</sub>) is 21750 based on GPC characterization. <sup>1</sup>H NMR (500 MHz, *d*<sub>6</sub>-DMSO and *d*-TFA) δ 8.37–8.26 (m, 1H), 7.02 (s, 1H), 6.39–6.33(m, 2H), 4.42–4.07 (m, 7H), 3.83–3.20 (m, 11H), 2.73 (s, 2H), 2.17–2.08 (m, 4H), 1.80 (s, 4H), 1.19–1.10 (m, 9H).

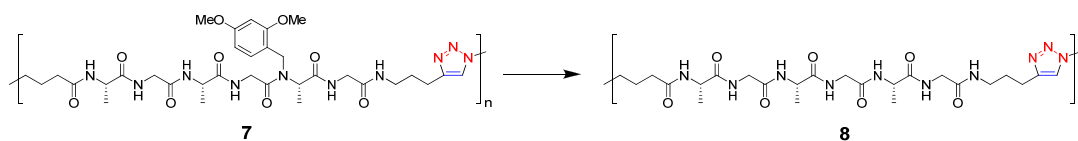

**Procedure for cleavage of 2,4-dimethoxybenzyl group:**

In a 20 mL sample vial, polymer **7** (5mg) was dissolved in 1 mL TFA mixed solution (TFA/TIPS/H<sub>2</sub>O=95:2.5:2.5). After stirring at room temperature for 60min, 9 mL of MeOH was introduced slowly into the vial. Cotton-like precipitate appeared overnight which was purified by three Times of centrifugation and redispersion with MeOH to give 3mg of polymer **8**. <sup>1</sup>H NMR (500 MHz, *d*<sub>6</sub>-DMSO and *d*-TFA) δ 8.05 (s, 1H), 4.41 (s, 2H), 4.19–4.13 (m, 3H), 4.97–4.70 (m, 6H), 3.12 (s, 2H), 2.69–2.67 (m, 2H), 2.24–2.10 (m, 4H), 1.74 (s, 1H), 1.08–0.82 (m, 9H).

### III. $^1\text{H}$ NMR spectra of polymer 7 and 8

After TFA/DCM deprotection, the proton peaks attributed to 2,4-dimethoxybenzyl group completely disappeared (spectra were taken in 50% *d*-TFA and DMSO-*d*6) (Fig. S1).

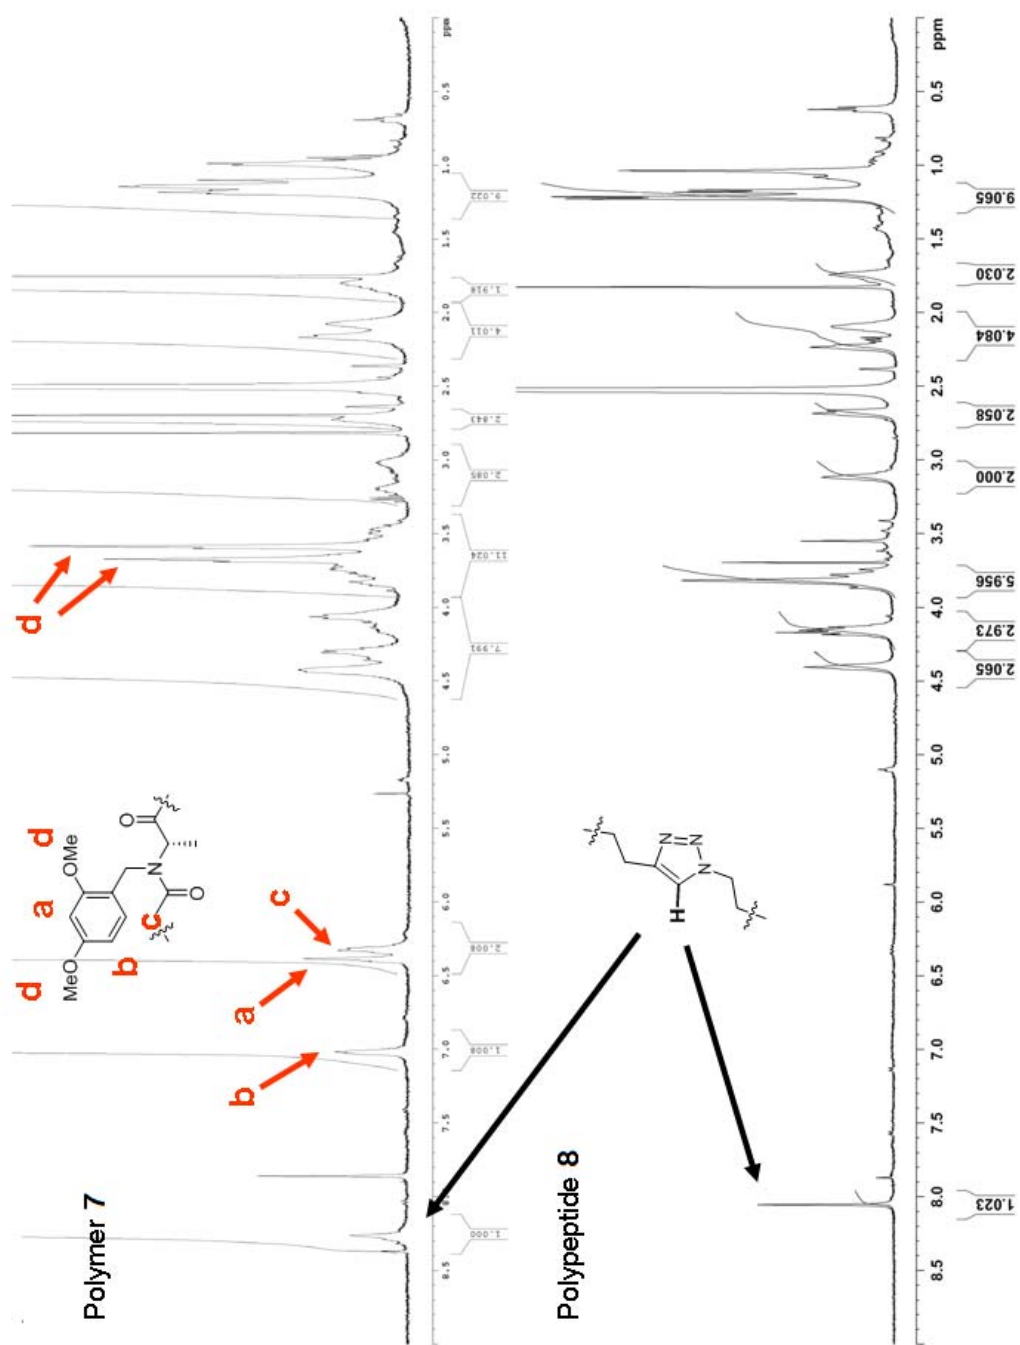

Figure S1. NMR spectra of polymer 7 and 8.



#### IV. Circular Dichroism (CD) measurement

Following literature procedure, we utilized CD to identify secondary structure for polymer **8**. 250  $\mu\text{L}$  of peptide **8** solution ( $\sim 2$  mg/mL in hexafluoroisopropanol (HFIP)) was added in a 1.0-mm length UV cell. Far-UV CD spectra were measured at room temperature on a Jasco J-810 spectropolarimeter (band width: 1nm, response: 1sec., sensitivity: standard, 1 range: 250-190 nm, data pitch: 0.5 nm, scanning speed: 20 nm/min., accumulation: 5). A representative CD spectrum for **8** is shown in Fig. S2. The CD spectra obtained in hexafluoroisopropanol (HFIP) solution exhibit a minima around 206 nm and maxima around 195 nm, which has also been observed in biosynthetic poly(AG)<sub>3</sub>YG or poly(AG)<sub>3</sub>HG systems.<sup>6</sup> The unusual shape of spectrum could result from either the formation of  $\pi$ - $\pi$  stacking in the 1,2,3-triazole ring turn mimics or regular arrangement of  $\beta$ -turn, which might facilitate coupling of the dipole transition moments.<sup>6a</sup>

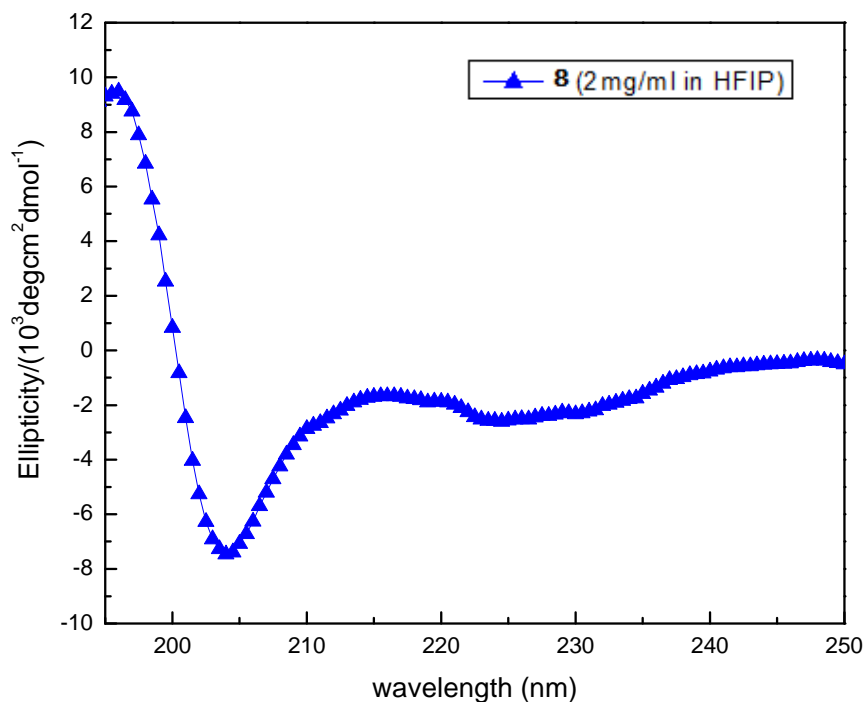

*Figure S2.* Circular dichroism spectrum of polypeptide **8**.

## V. FTIR characterization of polymer 7 and polymer 8

Infrared (IR) spectra were recorded on a MIDAC Grams/Prospect FT-IR spectrometer using a KBr pellet. All powder samples and KBr were ground to reduce the particle size. Then the mixture powder was pressed into a pellet. The IR spectra of polymer **7** revealed a major strong amide I vibration band at  $\sim 1655$ , indicating random coil secondary conformation in peptide (Figure S3a).<sup>7</sup> The IR spectra of polymer **8**, on the other hand, exhibited strong amide I and II vibrational bands at  $\sim 1628$   $\text{cm}^{-1}$  and  $\sim 1533$   $\text{cm}^{-1}$ , characteristic of the  $\beta$ -sheet conformation.<sup>6</sup> In addition, the weak amide I component observed at  $\sim 1695$   $\text{cm}^{-1}$  indicates its antiparallel nature (Figure S3b).<sup>7</sup> The amide I band  $\sim 1650$   $\text{cm}^{-1}$  indicates that some fraction of polymer chain has adopted a secondary structure other than that of the antiparallel  $\beta$ -sheet, where may result from breaking of the crystalline structure while physically mixing sample with KBr salt in the sample preparation.

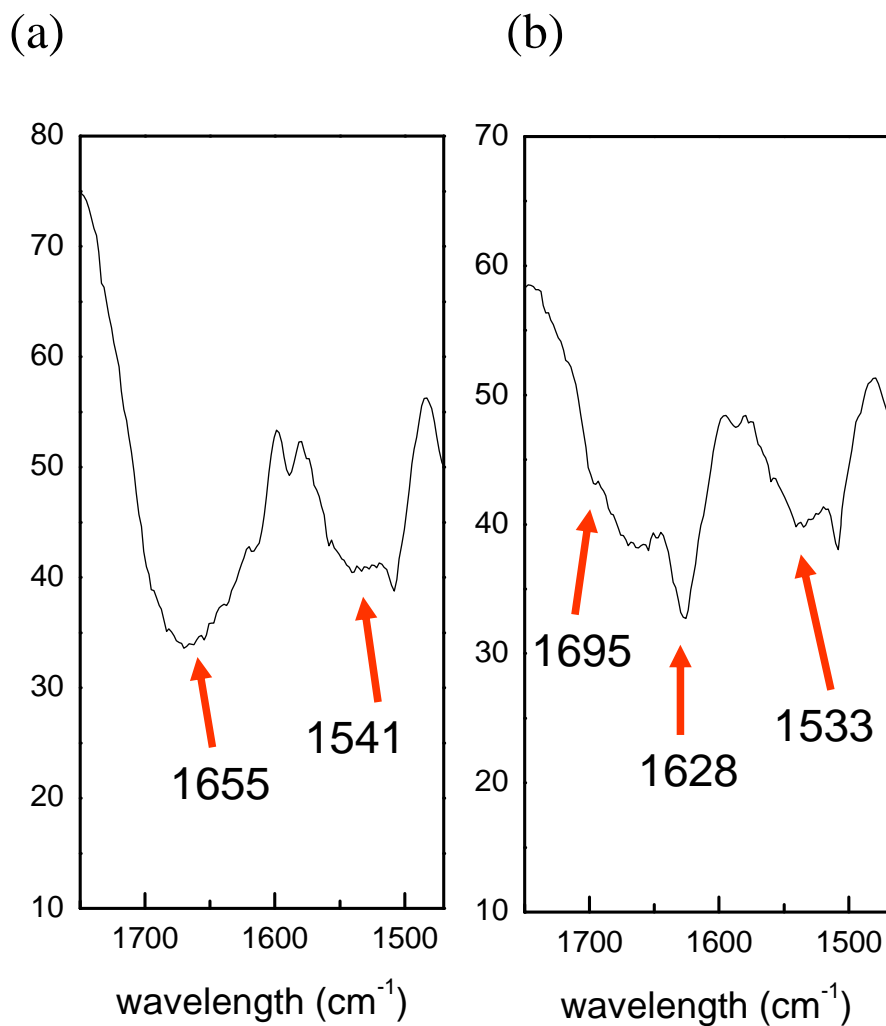

**Figure S3.** Infrared (IR) spectra of (a) **7** (b) **8**.

## VI. Transmission Electron Microscopy (TEM) Analysis

**Sample Preparation of Transmission Electron Microscopy:** A drop of polymer **8** solutions which crystallized in MeOH/TFA solution with concentrations of 0.5 mg/mL was incubated onto a carbon-coated TEM grid for 1 min, then blotted with filter paper. The grid was floated with 2% uranyl acetate solution. After 60sec incubation, the excess uranyl acetate solution was blotted with filter paper. The sample grid was then dried in vacuo overnight. The investigations were performed on a FEI/Philips CM-20 conventional TEM equipped with an EDAX EDS system operated at an acceleration voltage of 200 kV. Images were recorded either on a CCD camera for bright field imaging. Representative images and histogram of fibril width are shown in Fig. S4 &5, respectively.

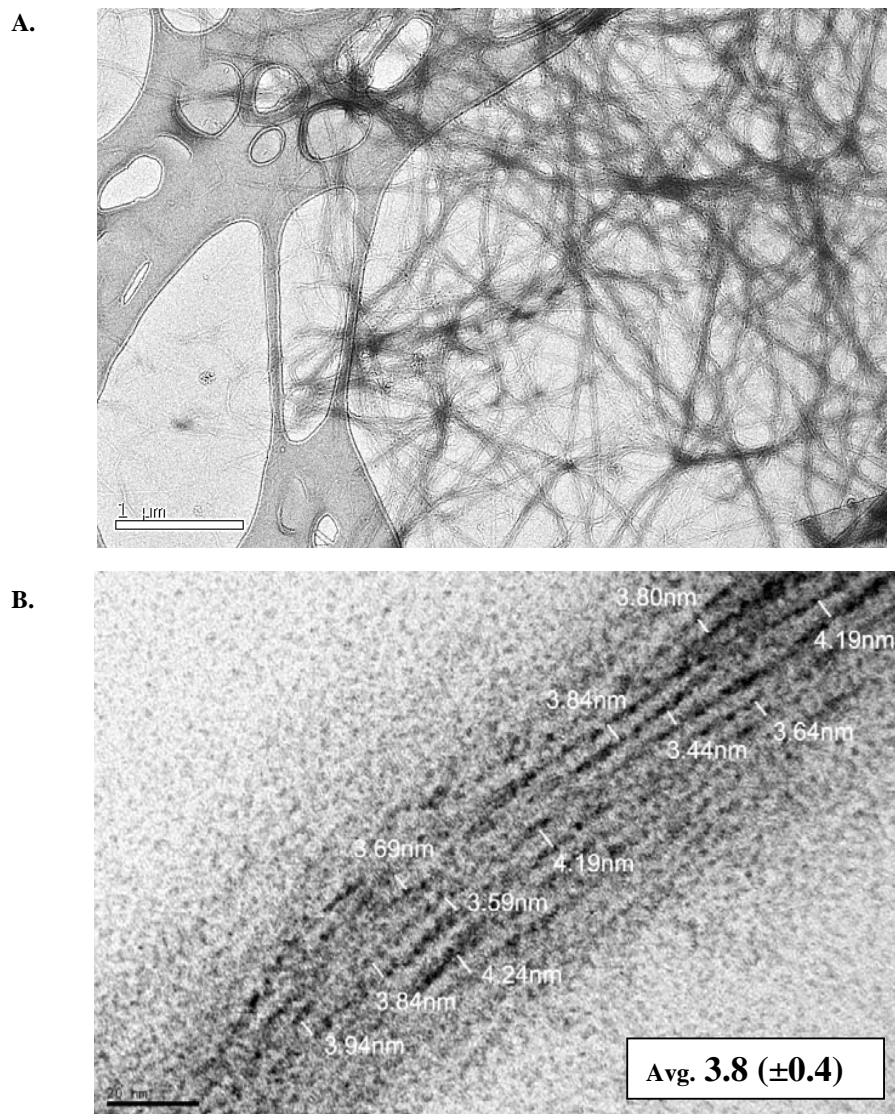

**Figure S4.** TEM images of fibril formed by polypeptide **8**. (A) Nanofibrils on TEM grid; (B) A zoom up view of one nanofibril. Scale bar on top image: 1  $\mu$ m, scale on bottom image: 20nm.

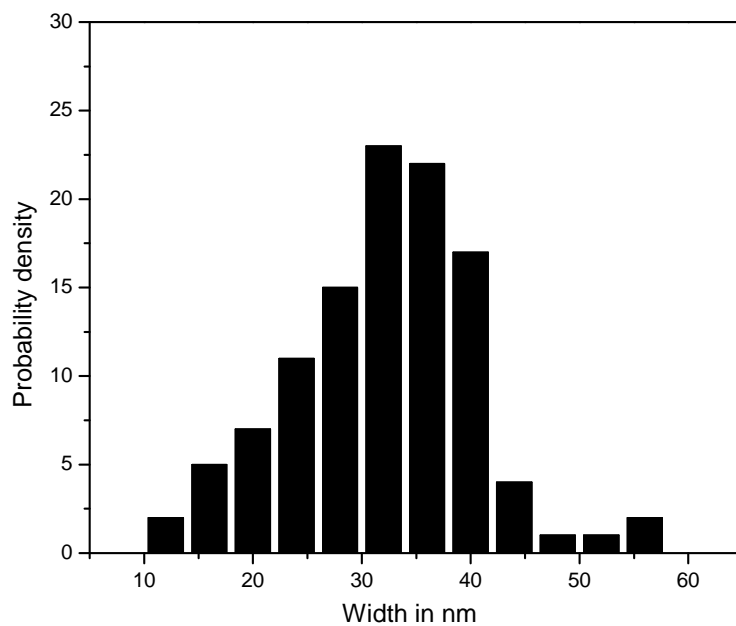

**Figure S5.** Probability density plot of nanofibril width measured from TEM images of **8**. A total of 110 samplings data were employed in constructing this distribution profile.

## VII. Atomic Force Microscopy (AFM) Analysis

Polymer solutions with concentrations of 0.5 mg/mL were spin-coated onto a freshly cleaved mica surface. The morphologies of the samples were analyzed by means of tapping-mode AFM with a Veeco Multimode instrument with a NanoScope IV controller operating in air at room temperature. Height (Figure S6) and phase images were recorded with microfabricated silicon cantilevers (FESP probes, Veeco, Santa Barbara). Set point was chosen at attractive regime. Representative images, height profiles and histogram of height for nanofibrils are shown in Fig. S6-8.

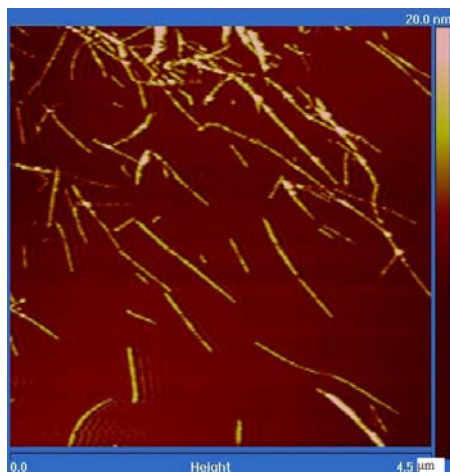

**Figure S6.** AFM micrograph of fibril formed by polypeptide **8**.

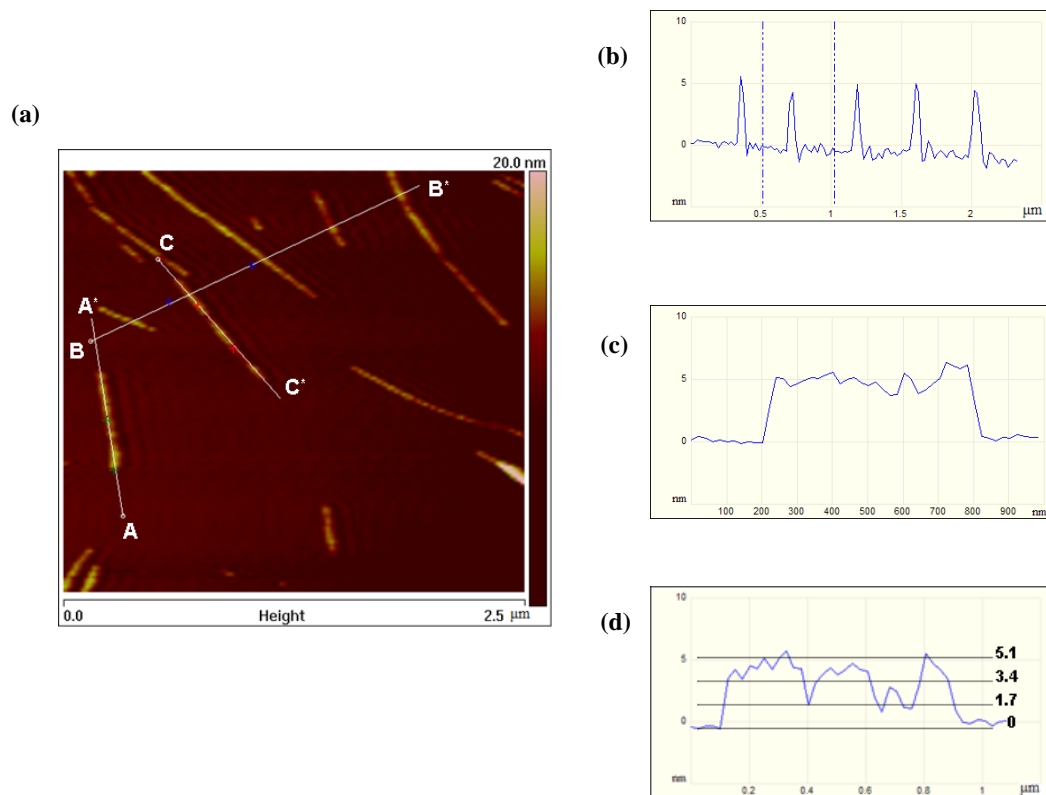

**Figure S7.** (a) AFM micrograph of fibril formed by polymer **8**. (b) height along A to A\* on the fibril. (c) height along B to B\* on the fibril. (d) height along C to C\* on the fibril.

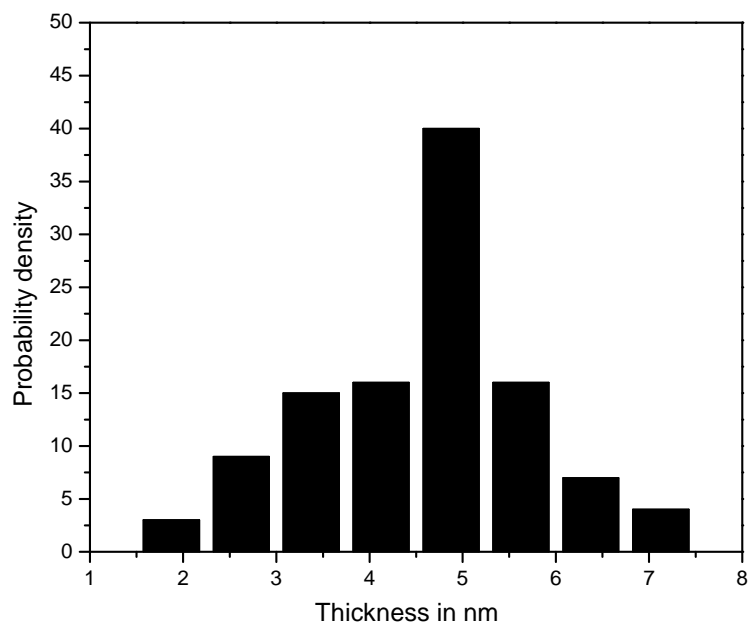

**Figure S8.** Probability density plot of nanofibril height measured from AFM topographic data of **8**. A total of 110 samplings data were employed in this distribution profile.

### VIII. Wide Angle X-Ray Diffraction (WXR) analysis of 8

The powder of sample was prepared by removing the solvent from the crystallized fibril solution. The crystalline powder sample was packed into a thin-walled glass tube. The powder of the samples were analyzed by means of Four Circle Wide Angle X-ray Spectrometer (WAXS) equipped with an OSMIC double focusing multilayer monochromator and a MAR 345 mm diameter image plate detector. The X-ray source: 18 kW Rigaku rotating anode x-ray generator (Cu anode,  $\lambda = 1.54 \text{ \AA}$ ). The major reflections at d spacings of 4.57, 4.22, and 3.64  $\text{\AA}$  (Fig. S9), which are consistent with the antiparallel  $\beta$ -sheet d spacings reported for the unoriented fibroin film<sup>8</sup> and the polymer (AG)<sub>n</sub> made by genetic engineering.<sup>9</sup>

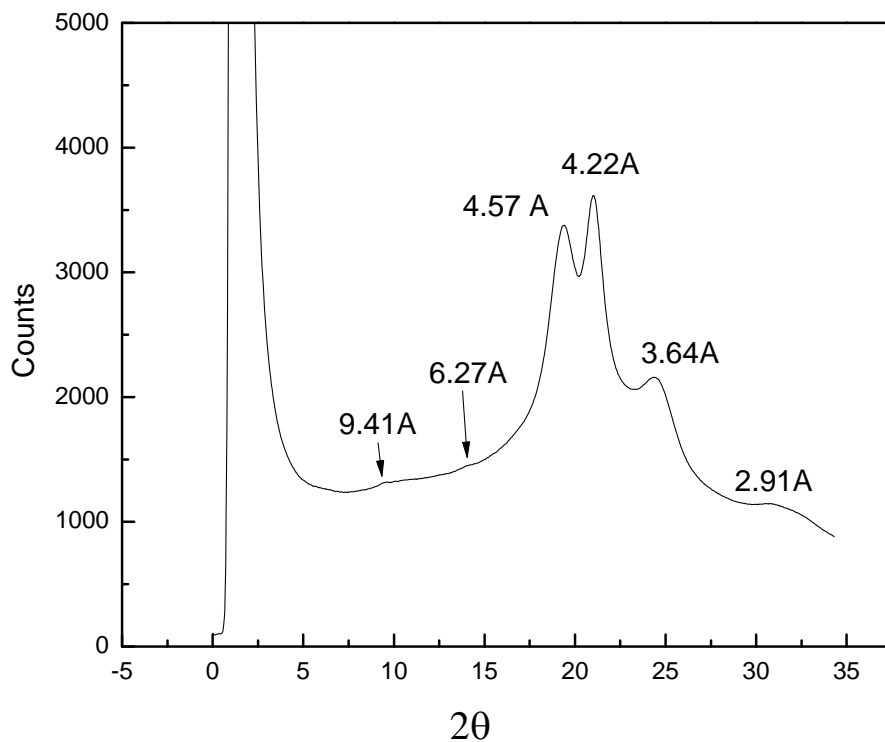

**Figure S9.** Wide angle X-ray diffraction of solid Polypeptide 8.

## IX. Reference

- [1] *NovaBiochem Catalog*, **2003**.
- [2] K. Oh, Z. Guan, *Chem. Comm.* **2006**, 3069.
- [3] (a) T. E. Muller, A. -K. Pleier, *J. Chem. Soc., Dalton Trans.* **1999**, 583.  
(b) D. Perez, G. Bures, E. Guitian, L. Castedo, *J. Org. Chem.* **1996**, *61*, 1650.  
(c) E. C. Taylor, J. E. Macor, J. L. Pont, *Tetrahedron* **1987**, *43*, 5145.
- [4] N. Khoukhi, M. Vaultier, R. Carrie, *Tetrahedron* **1987**, *43*, 1811.
- [5] M. Van Dijk, K. Mustafa, A. C. Dechesne, C. F. Van Nostrum, ; W. E. Hennink, D. T. S. Rijkers, R. M. J. Liskamp, *Biomacromolecules*, **2007**, *8*, 327.
- [6] (a) N. I. Topilina, S. Higashiya, N. Rana, V. V. Ermolenkov, C. Kossow, A. A. Carlsen, S. C. Ngo, C. C. Wells, E. T. Eisenbraun, K. A. Dunn, I. K. Lednev, R. E. Geer, A. E. Kaloyeros, J. T. Welch, *Biomacromolecules* **2006**, *7*, 1104.  
(b) I. K. Lednev, V. V. Ermolenkov, S. Higashiya, L. A. Popova, N. I. Topilina, J. T. Welch, *Biophys. J.* **2006**, *91*, 3805.  
(c) S. Higashiya, N. I. Topilina, S. C. Ngo, D. Zagorevskii, J. T. Welch, *Biomacromolecules* **2007**, *8*, 1487.  
(d) M. W. T. Werten, A. P. H. A. Moers, T. Vong, H. Zuilhof, J. C. M. van Hest, F. A. de Wolf, *Biomacromolecule* **2008**, *9*, 1705.  
(e) J. Safar, P. P. Roller, G. C. Ruben, D. C. Gajdusek, C. J. Jr. Gibbs, *Biopolymers* **1993**, *33*, 1461.
- [7] (a) T. Miyazawa, E. R. Blout, *J. Am. Chem. Soc.* **1961**, *83*, 712.  
(b) P. I. Haris, D. Chapman, *Biopolymers* **1995**, *37*, 251.



# X. NMR and FTIR spectra

## <sup>1</sup>H NMR and <sup>13</sup>C NMR spectra of 2

TBY333-H1-CDCl3  
<sup>1</sup>H spectrum

ppm

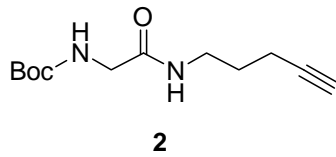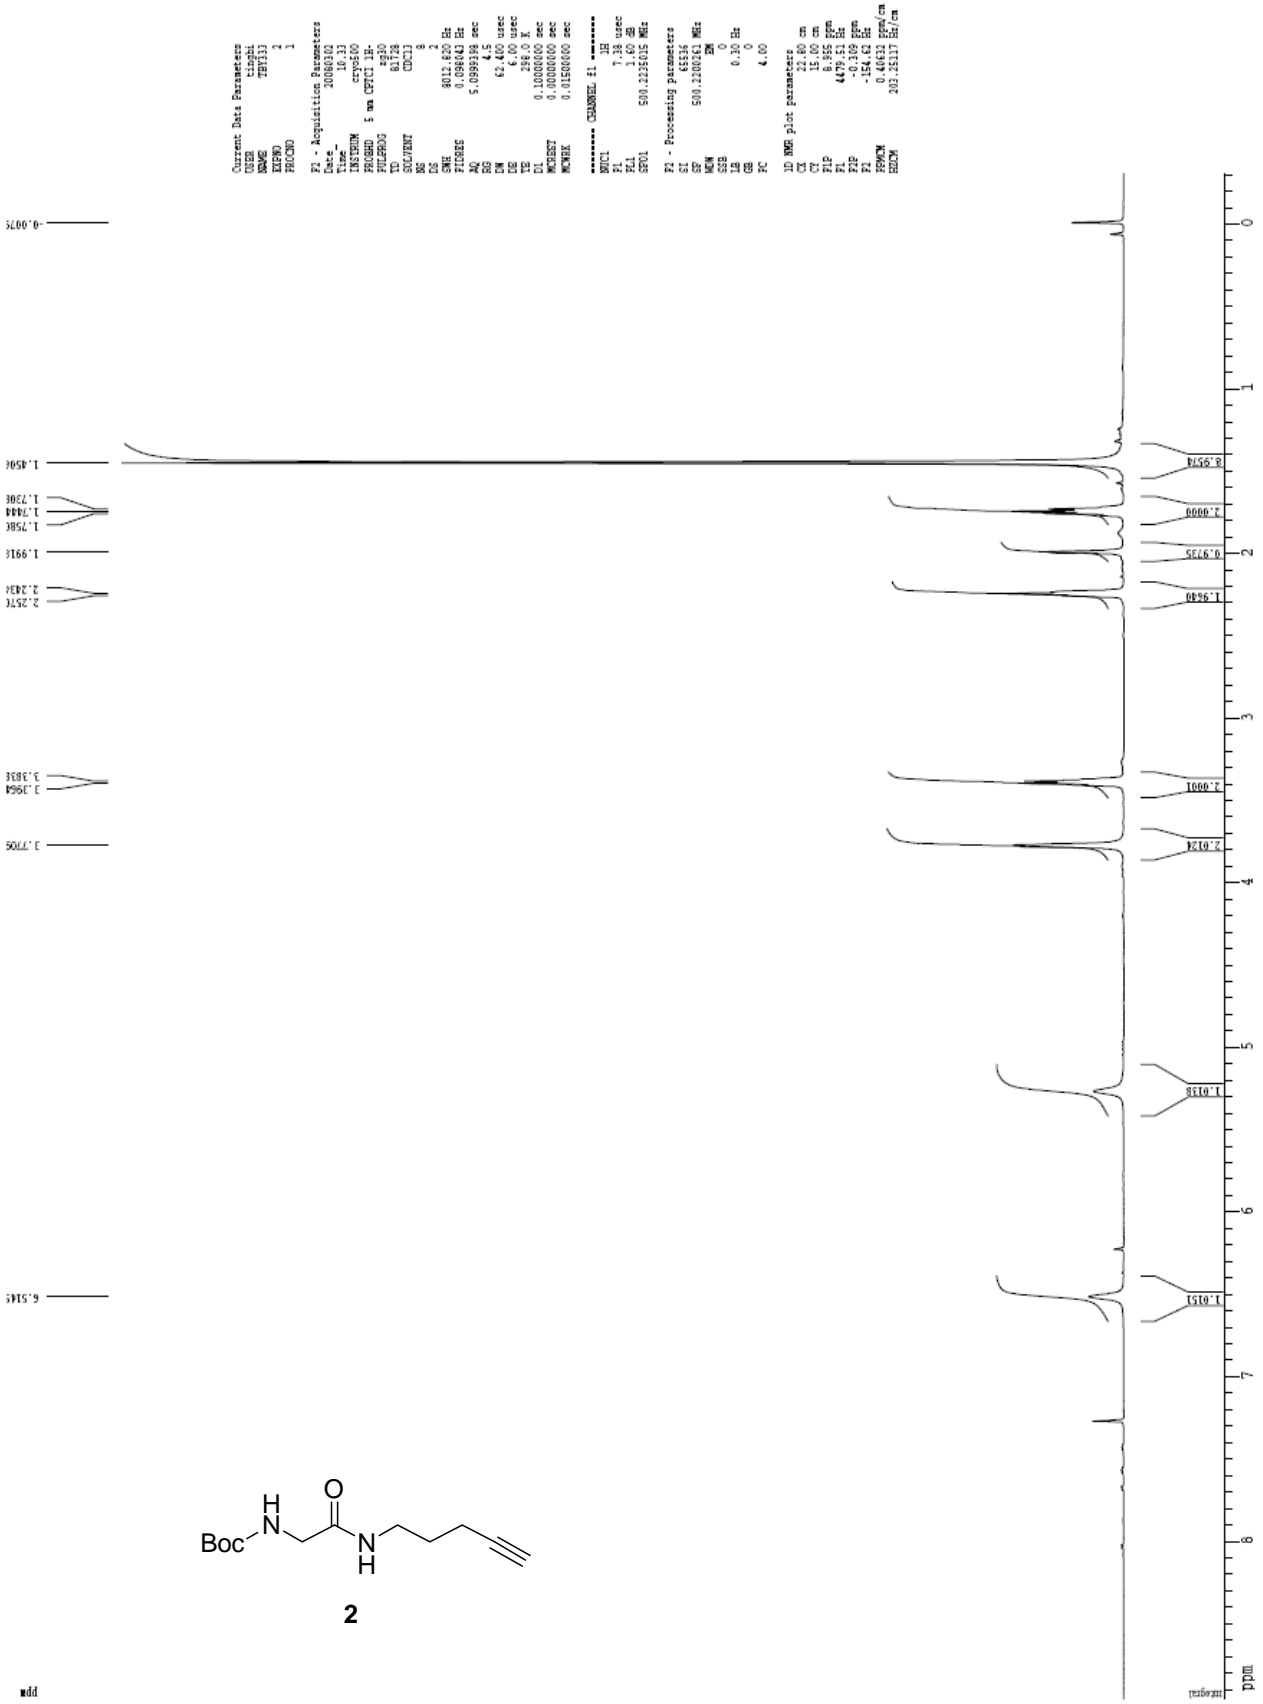

TBY333-Cl3-CDC13  
 13C spectrum with 1H decoupling

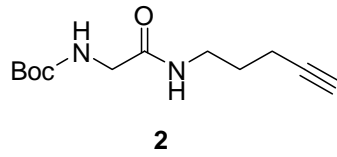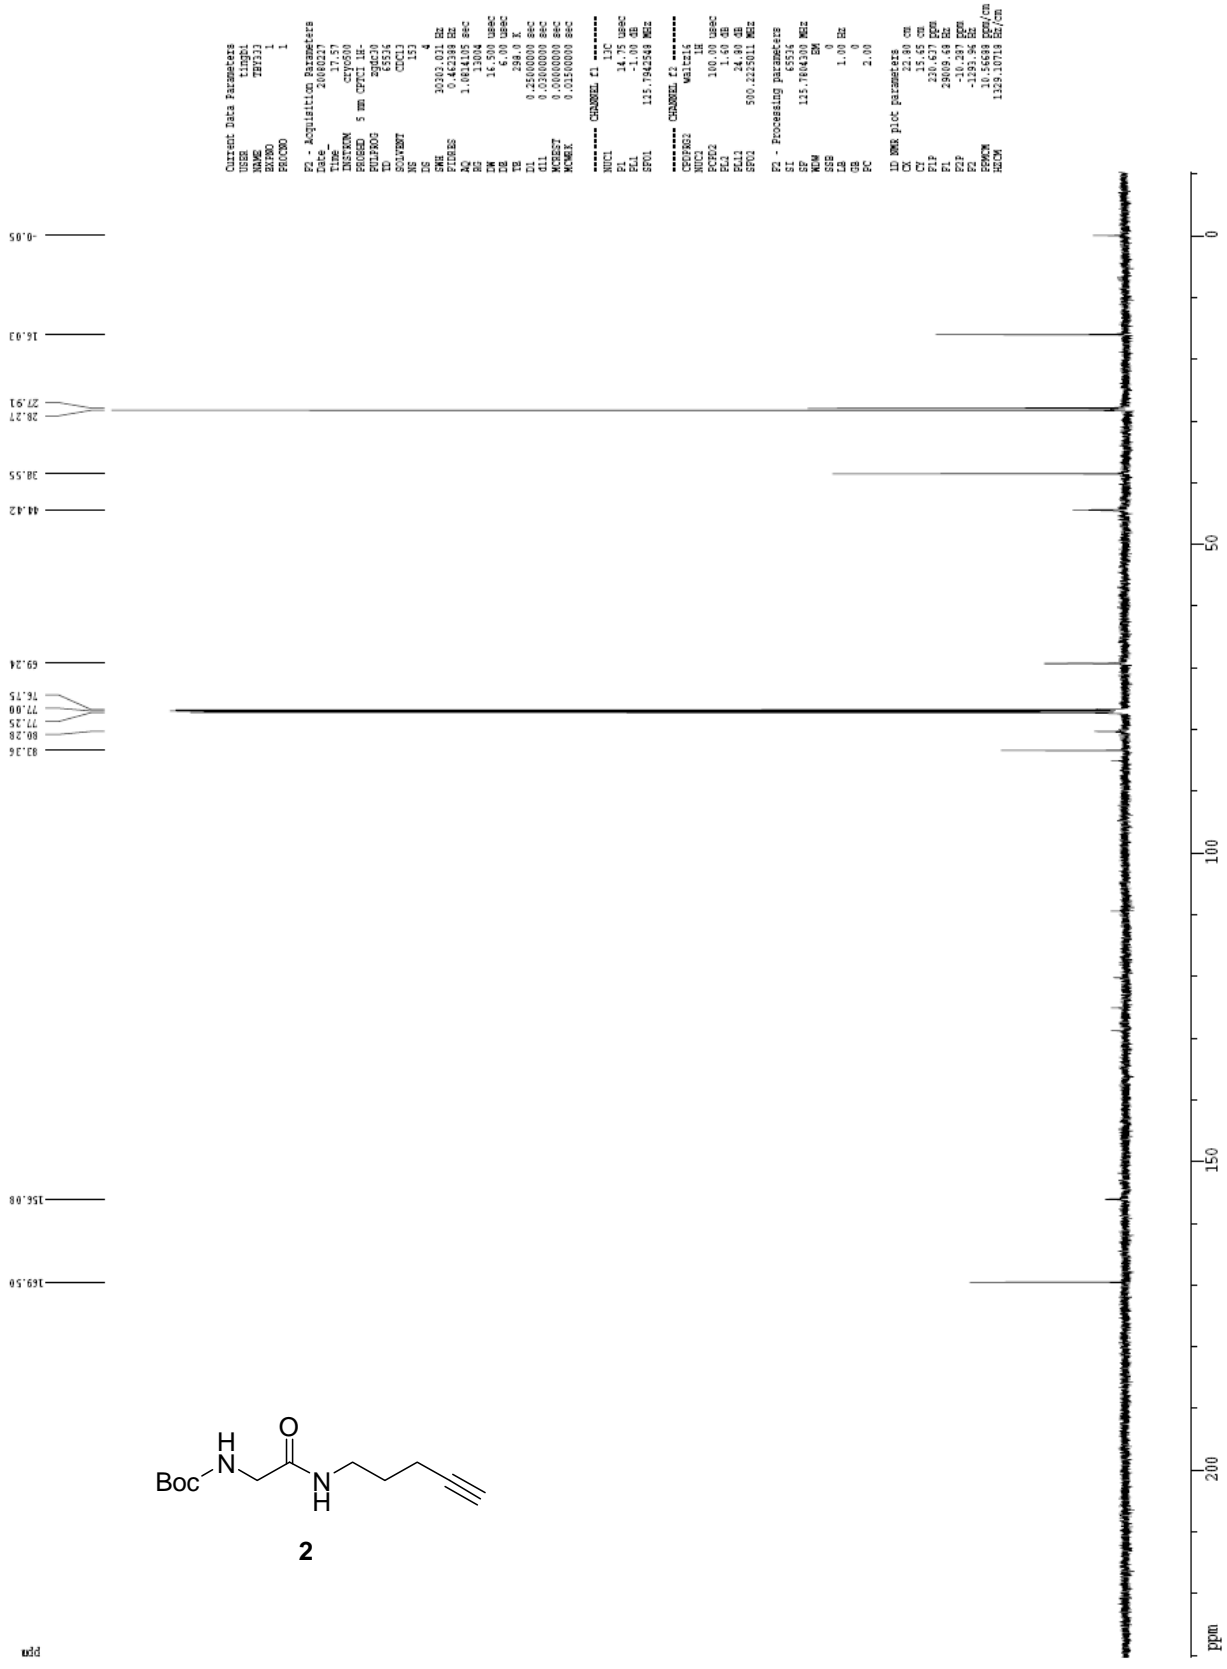

<sup>1</sup>H NMR and <sup>13</sup>C NMR spectra of **3**

TBY341-H1-CDC13  
<sup>1</sup>H spectrum  
 pdf

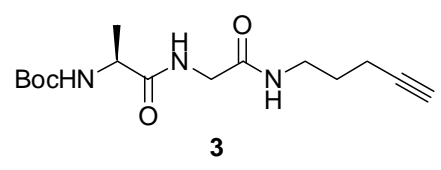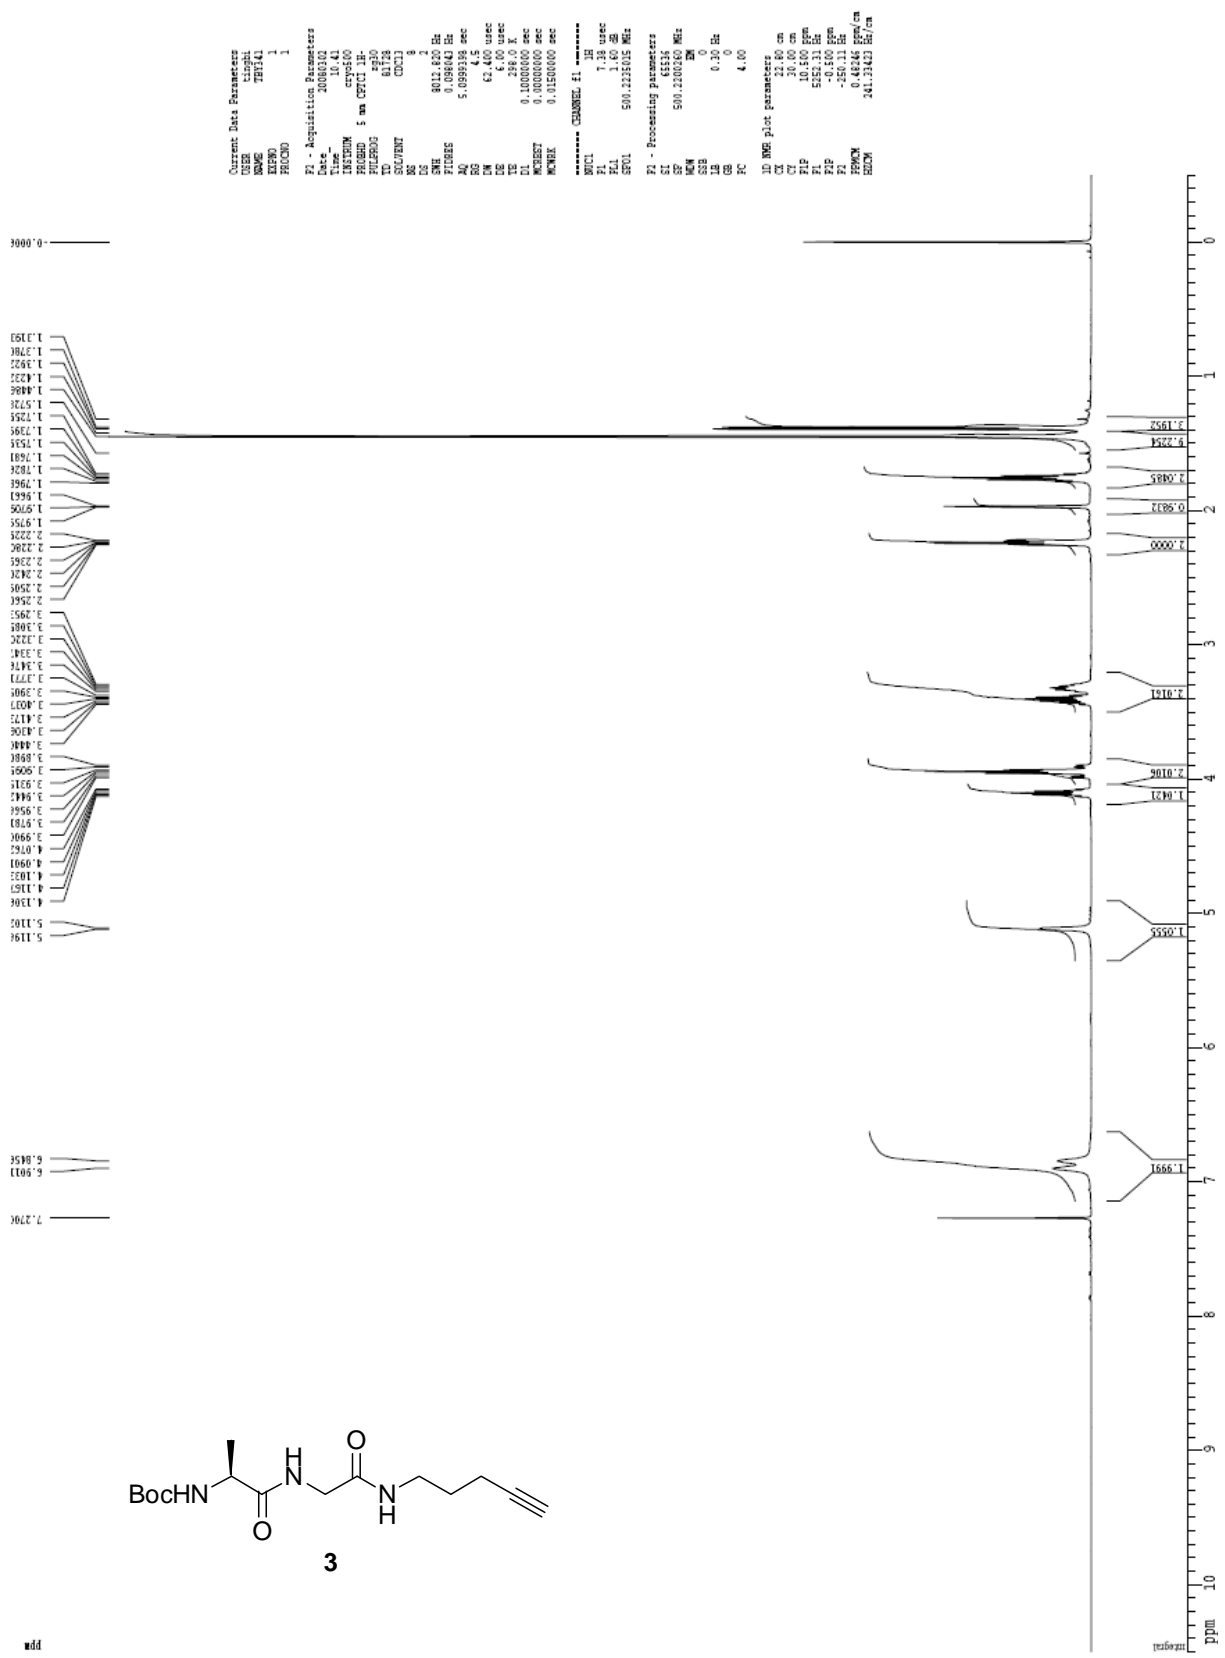

Current Data Parameters  
 USBR 1  
 NAME TBY341  
 EXPNO 1  
 PROCNO 1

F1 - Acquisition Parameters  
 Date\_ 20080102  
 Time 10:41  
 User JRM  
 INSTRUM spect  
 PROGRAM 1 nm CPTC1 3H  
 PULPROG zgpg30  
 TD 65536  
 SFO 500.136261  
 SOLVENT CDCl3  
 NS 3  
 DS 2  
 SWH 8012.820 Hz  
 FIDRES 0.099442 Hz  
 AQ 5.0999196 sec  
 RG 327.5  
 EQ 62.400 usec  
 DE 6.00 usec  
 TE 298.0 K  
 D0 0.1000000 sec  
 WALTZ16 0.1000000 sec  
 MCKEY 0.01500000 sec

\*\*\*\*\* CHANNEL f1 \*\*\*\*\*  
 NUC1 13C  
 P1 1.38 usec  
 PL 1.60 dB  
 SFO1 500.225015 MHz

F2 - Processing parameters  
 SI 65536  
 SF 500.220000 MHz  
 MCH 2M  
 US 0.30 Hz  
 DS 0  
 FC 4.00

1D NMR plot parameters  
 SI 65536  
 CT 30.00 cm  
 PTP 10.500 ppm  
 FI 5.8231 Hz  
 SFO 500.136261 MHz  
 F2 -250.13 Hz  
 FREQM 0.48246 ppm/cm  
 BPCOM 241.31423 Hz/cm





TBY352-Cl3-DMSO  
 13C spectrum with 1H decoupling

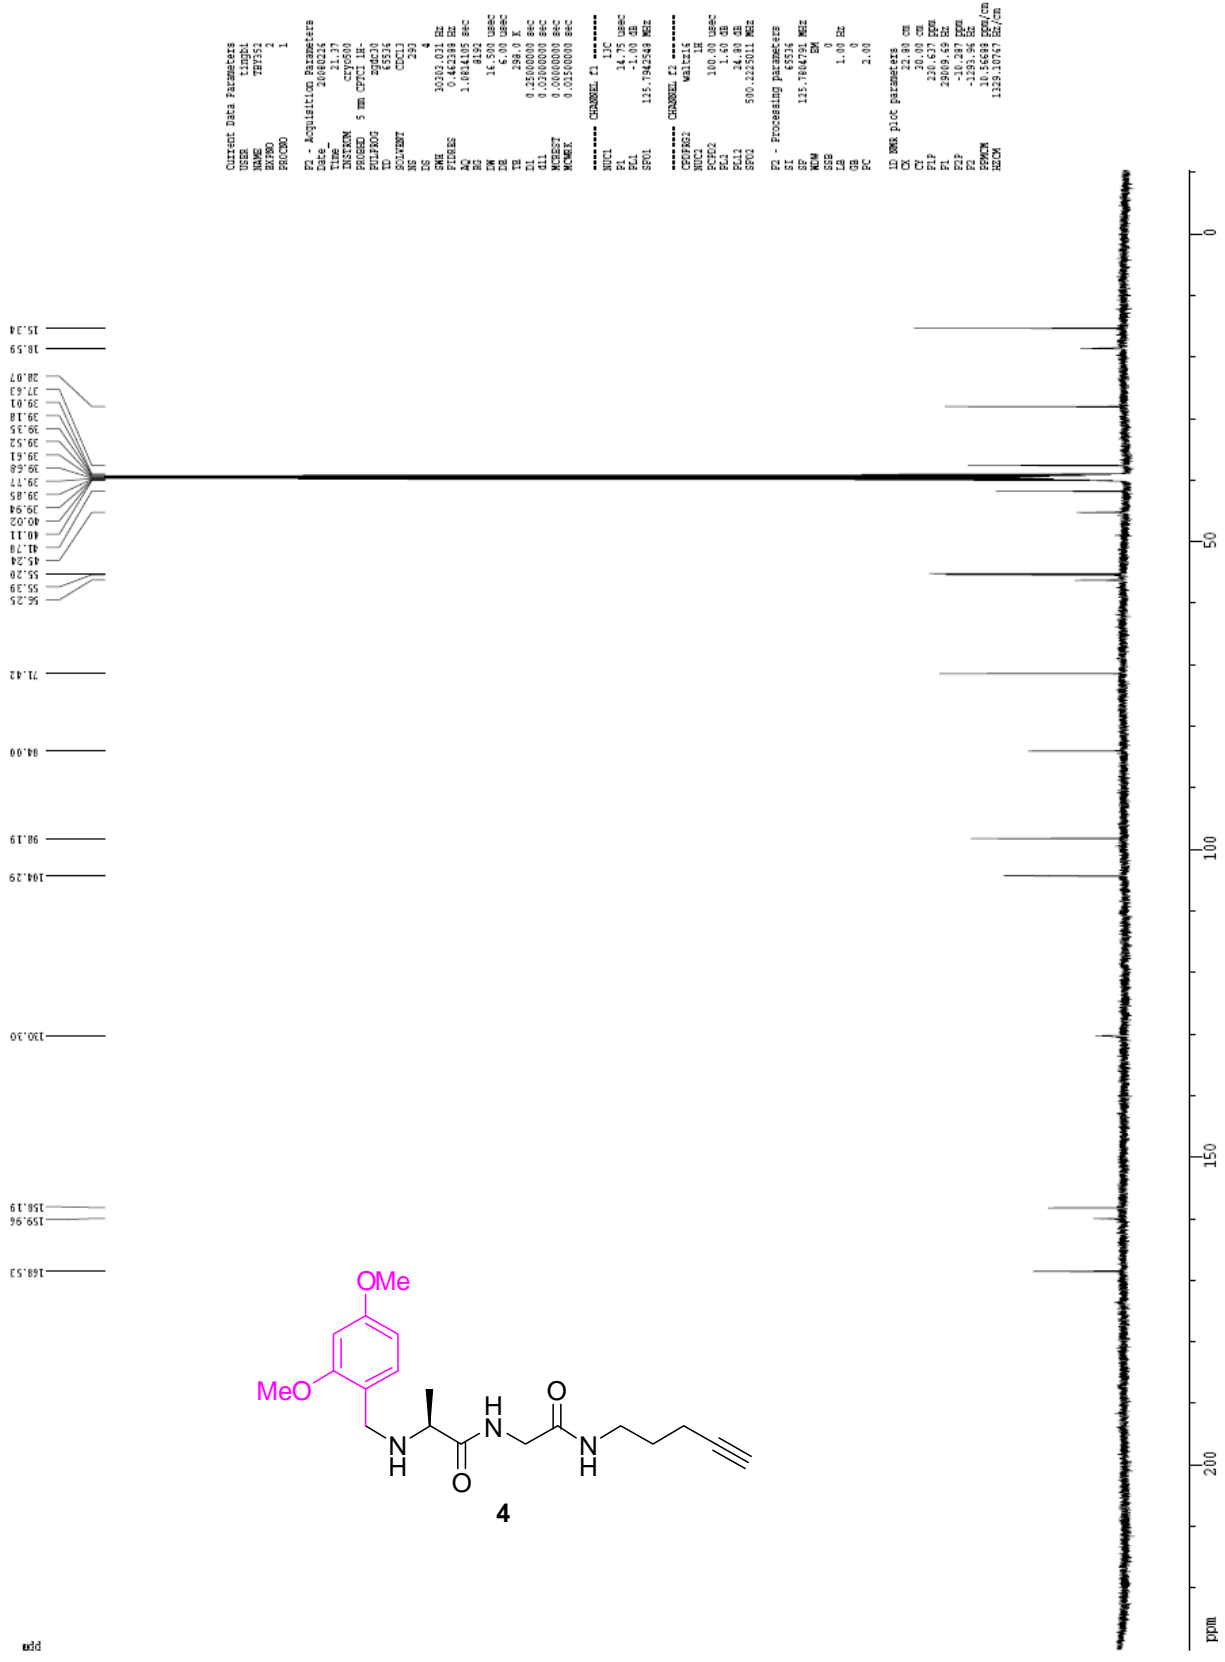

```

Current Data Parameters
USER      limpa
NAME      TBY352
PROCNO    1
PROCDS    1
F2 - Acquisition Parameters
Date_     20080214
Time      21:17
INSTRUM   spect
PROBHD    5 mm CPCLP1H
PULPROG   zgpg30
TD         65536
SOLVENT   CDCl3
DS         4
SWH        10202.011 Hz
FIDRES     0.442388 Hz
AQ         1.091405 sec
RG         655.36
WM         16.500 USBC
ZG         6.00 USBC
TE         298.0 K
DIL        0.25000000
SFO1       101.625361 MHz
NUC1       13C
P1         12.00 USBC
PC         1.00 dB
SFO2       125.764548 MHz
===== CHANNEL f1 =====
NUC2       13C
P2         12.00 USBC
PC         1.00 dB
SFO3       500.125011 MHz
===== CHANNEL f2 =====
NUC3       1H
P3         100.00 USBC
PC         1.40 dB
SFO4       500.125011 MHz
===== CHANNEL f3 =====
NUC4       1H
P4         100.00 USBC
PC         1.40 dB
===== Processing parameters =====
SI         65536
SF          125.764548 MHz
WDW         EM
SSB         0
LB         1.00 Hz
GB         0
PC         2.00
===== 1D DMSO plot parameters =====
CX         22.80 cm
CY         30.00 cm
FLP        230.637 ppm
PL         28008.65 Hz
PC1        1.00 dB
PC2        1.00 dB
PC3        1.00 dB
PC4        1.00 dB
PC5        1.00 dB
PC6        1.00 dB
PC7        1.00 dB
PC8        1.00 dB
PC9        1.00 dB
PC10       1.00 dB
PC11       1.00 dB
PC12       1.00 dB
PC13       1.00 dB
PC14       1.00 dB
PC15       1.00 dB
PC16       1.00 dB
PC17       1.00 dB
PC18       1.00 dB
PC19       1.00 dB
PC20       1.00 dB
  
```



1B1382-Cl3-DMSO  
 13C spectrum with 1H decoupling

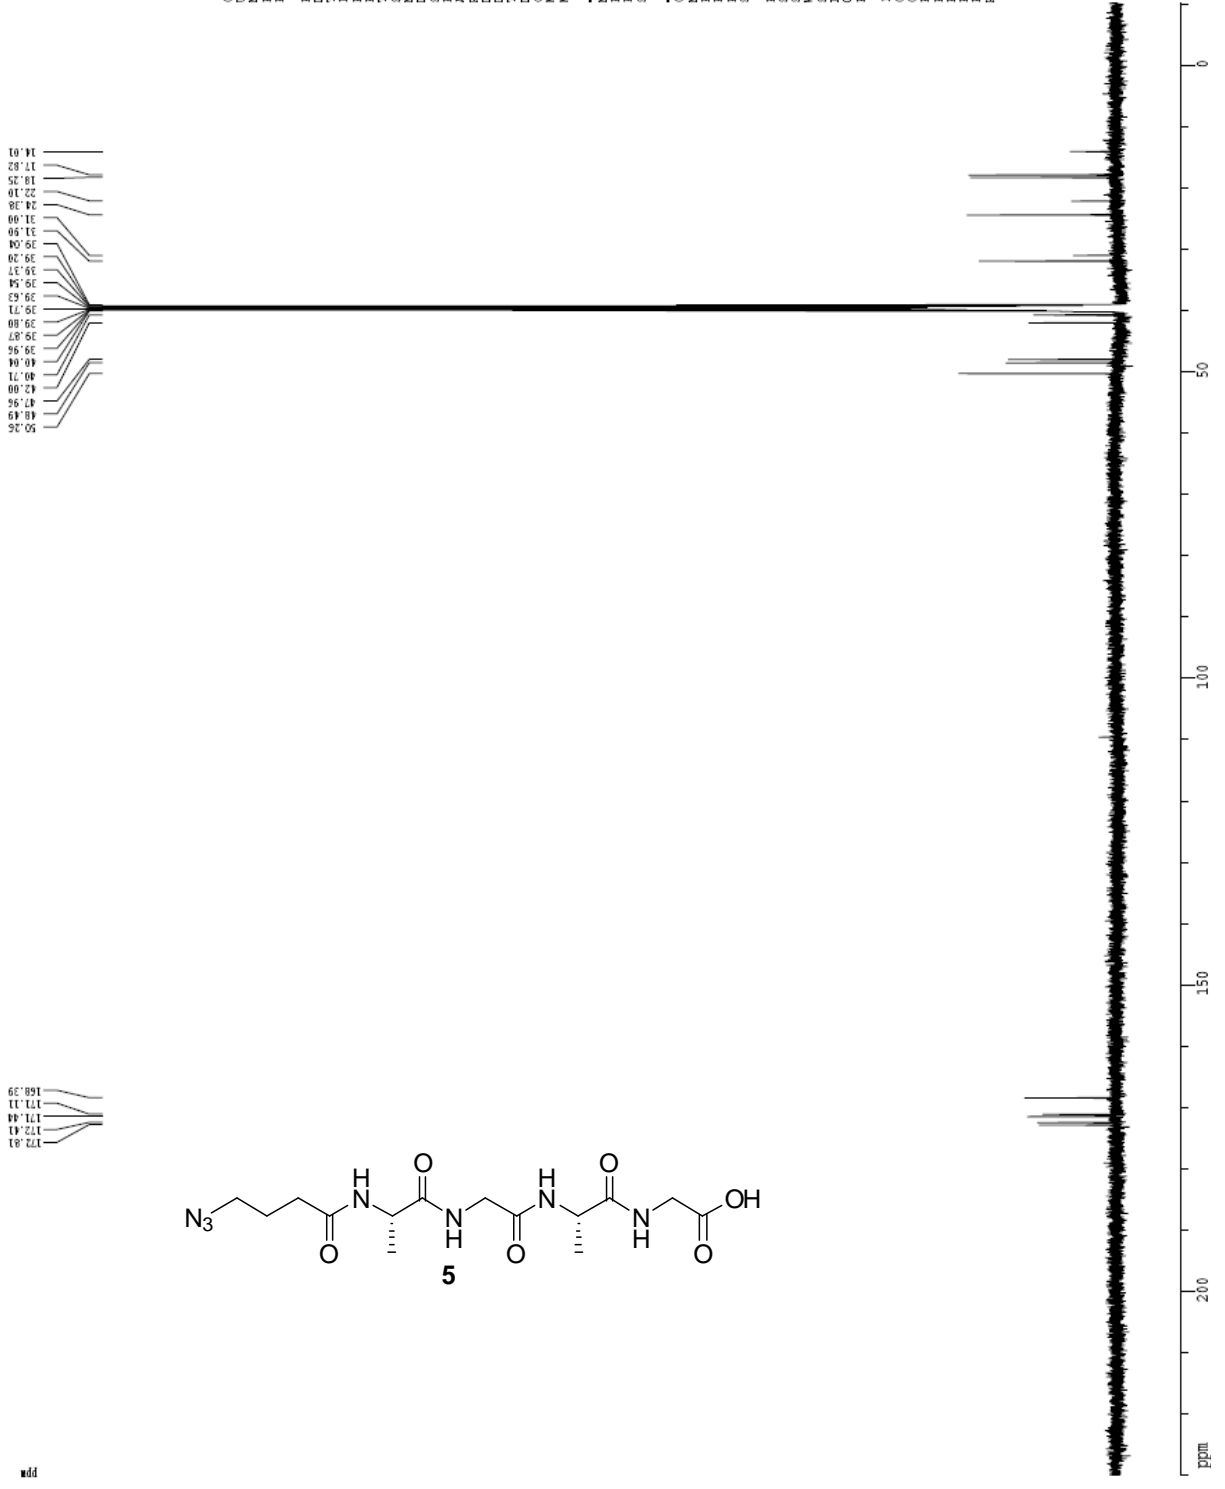

Current Data Parameters  
 USER: CLM3  
 NAME: 1B1382  
 EXPNO: 2  
 PROCNO: 1

F1 - Acquisition Parameters  
 Date\_: 20090902  
 Time: 11.10  
 INSTRUM: cp13000  
 PULPROG: zgpg30  
 PROCNO: 5  
 FIDRES: 0.091405 Hz  
 AQ: 1.014105 sec  
 SFO1: 125.762548 MHz  
 D1: 0.25000000 sec  
 T1: 14.70 sec  
 T2: 294.0 K  
 D11: 0.03000000 sec  
 AQ11: 0.03000000 sec  
 PULPROG1: zgpg30  
 SFO11: 125.762548 MHz  
 FIDRES1: 0.091405 Hz

===== CHANNEL f1 =====  
 NUCL1: 13C  
 P1: 14.70 usec  
 PL1: 0.00 dB  
 SFO1: 125.762548 MHz

===== CHANNEL f2 =====  
 CHANNEL2: h1c131  
 P2: 1.00 usec  
 PL2: 0.00 dB  
 SFO2: 100.62 MHz  
 F2: 1.40 dB  
 P12: 24.40 dB  
 SFO12: 500.1225011 MHz

F1 - Processing parameters  
 SI: 65536  
 SF: 125.762548 MHz  
 DS: 4  
 AS: 0  
 L1: 1.00 Hz  
 GB: 0  
 PC: 2.00

DMSO f1/c2 parameters  
 C1: 50.00 cm  
 C2: 50.00 cm  
 P1P: 130.437 ppm  
 F1: 29005.69 Hz  
 F2: 10.787 ppm  
 F3: 10.787 ppm  
 F4: 10.787 ppm  
 F5: 10.787 ppm  
 F6: 10.787 ppm  
 F7: 10.787 ppm  
 F8: 10.787 ppm  
 F9: 10.787 ppm  
 F10: 10.787 ppm  
 F11: 10.787 ppm  
 F12: 10.787 ppm  
 F13: 10.787 ppm  
 F14: 10.787 ppm  
 F15: 10.787 ppm  
 F16: 10.787 ppm  
 F17: 10.787 ppm  
 F18: 10.787 ppm  
 F19: 10.787 ppm  
 F20: 10.787 ppm  
 F21: 10.787 ppm  
 F22: 10.787 ppm  
 F23: 10.787 ppm  
 F24: 10.787 ppm  
 F25: 10.787 ppm  
 F26: 10.787 ppm  
 F27: 10.787 ppm  
 F28: 10.787 ppm  
 F29: 10.787 ppm  
 F30: 10.787 ppm  
 F31: 10.787 ppm  
 F32: 10.787 ppm  
 F33: 10.787 ppm  
 F34: 10.787 ppm  
 F35: 10.787 ppm  
 F36: 10.787 ppm  
 F37: 10.787 ppm  
 F38: 10.787 ppm  
 F39: 10.787 ppm  
 F40: 10.787 ppm  
 F41: 10.787 ppm  
 F42: 10.787 ppm  
 F43: 10.787 ppm  
 F44: 10.787 ppm  
 F45: 10.787 ppm  
 F46: 10.787 ppm  
 F47: 10.787 ppm  
 F48: 10.787 ppm  
 F49: 10.787 ppm  
 F50: 10.787 ppm  
 F51: 10.787 ppm  
 F52: 10.787 ppm  
 F53: 10.787 ppm  
 F54: 10.787 ppm  
 F55: 10.787 ppm  
 F56: 10.787 ppm  
 F57: 10.787 ppm  
 F58: 10.787 ppm  
 F59: 10.787 ppm  
 F60: 10.787 ppm  
 F61: 10.787 ppm  
 F62: 10.787 ppm  
 F63: 10.787 ppm  
 F64: 10.787 ppm  
 F65: 10.787 ppm  
 F66: 10.787 ppm  
 F67: 10.787 ppm  
 F68: 10.787 ppm  
 F69: 10.787 ppm  
 F70: 10.787 ppm  
 F71: 10.787 ppm  
 F72: 10.787 ppm  
 F73: 10.787 ppm  
 F74: 10.787 ppm  
 F75: 10.787 ppm  
 F76: 10.787 ppm  
 F77: 10.787 ppm  
 F78: 10.787 ppm  
 F79: 10.787 ppm  
 F80: 10.787 ppm  
 F81: 10.787 ppm  
 F82: 10.787 ppm  
 F83: 10.787 ppm  
 F84: 10.787 ppm  
 F85: 10.787 ppm  
 F86: 10.787 ppm  
 F87: 10.787 ppm  
 F88: 10.787 ppm  
 F89: 10.787 ppm  
 F90: 10.787 ppm  
 F91: 10.787 ppm  
 F92: 10.787 ppm  
 F93: 10.787 ppm  
 F94: 10.787 ppm  
 F95: 10.787 ppm  
 F96: 10.787 ppm  
 F97: 10.787 ppm  
 F98: 10.787 ppm  
 F99: 10.787 ppm  
 F100: 10.787 ppm



<sup>1</sup>H NMR, COSY, <sup>13</sup>C NMR spectra of **6**

IBY337-1H-NEOH  
1H spectrum

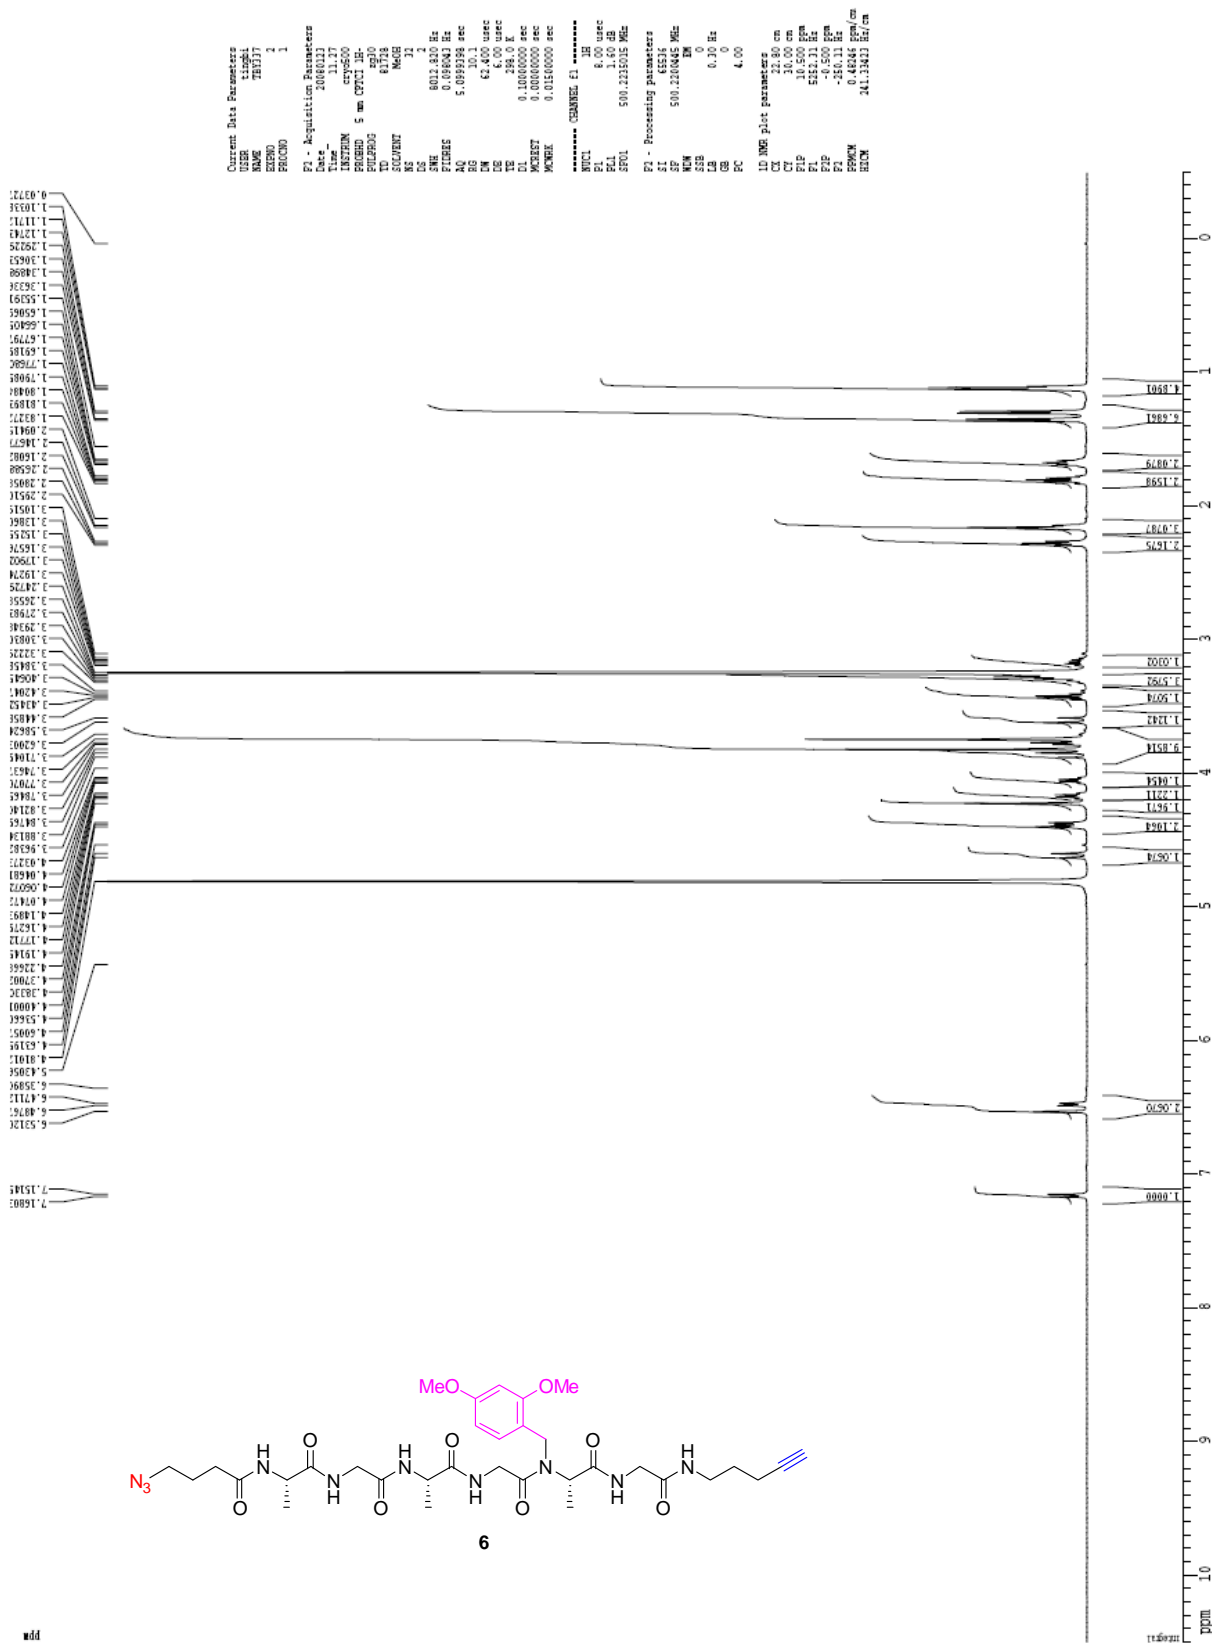



1B1337-Cl3-DMSO  
 13C spectrum with 1H decoupling

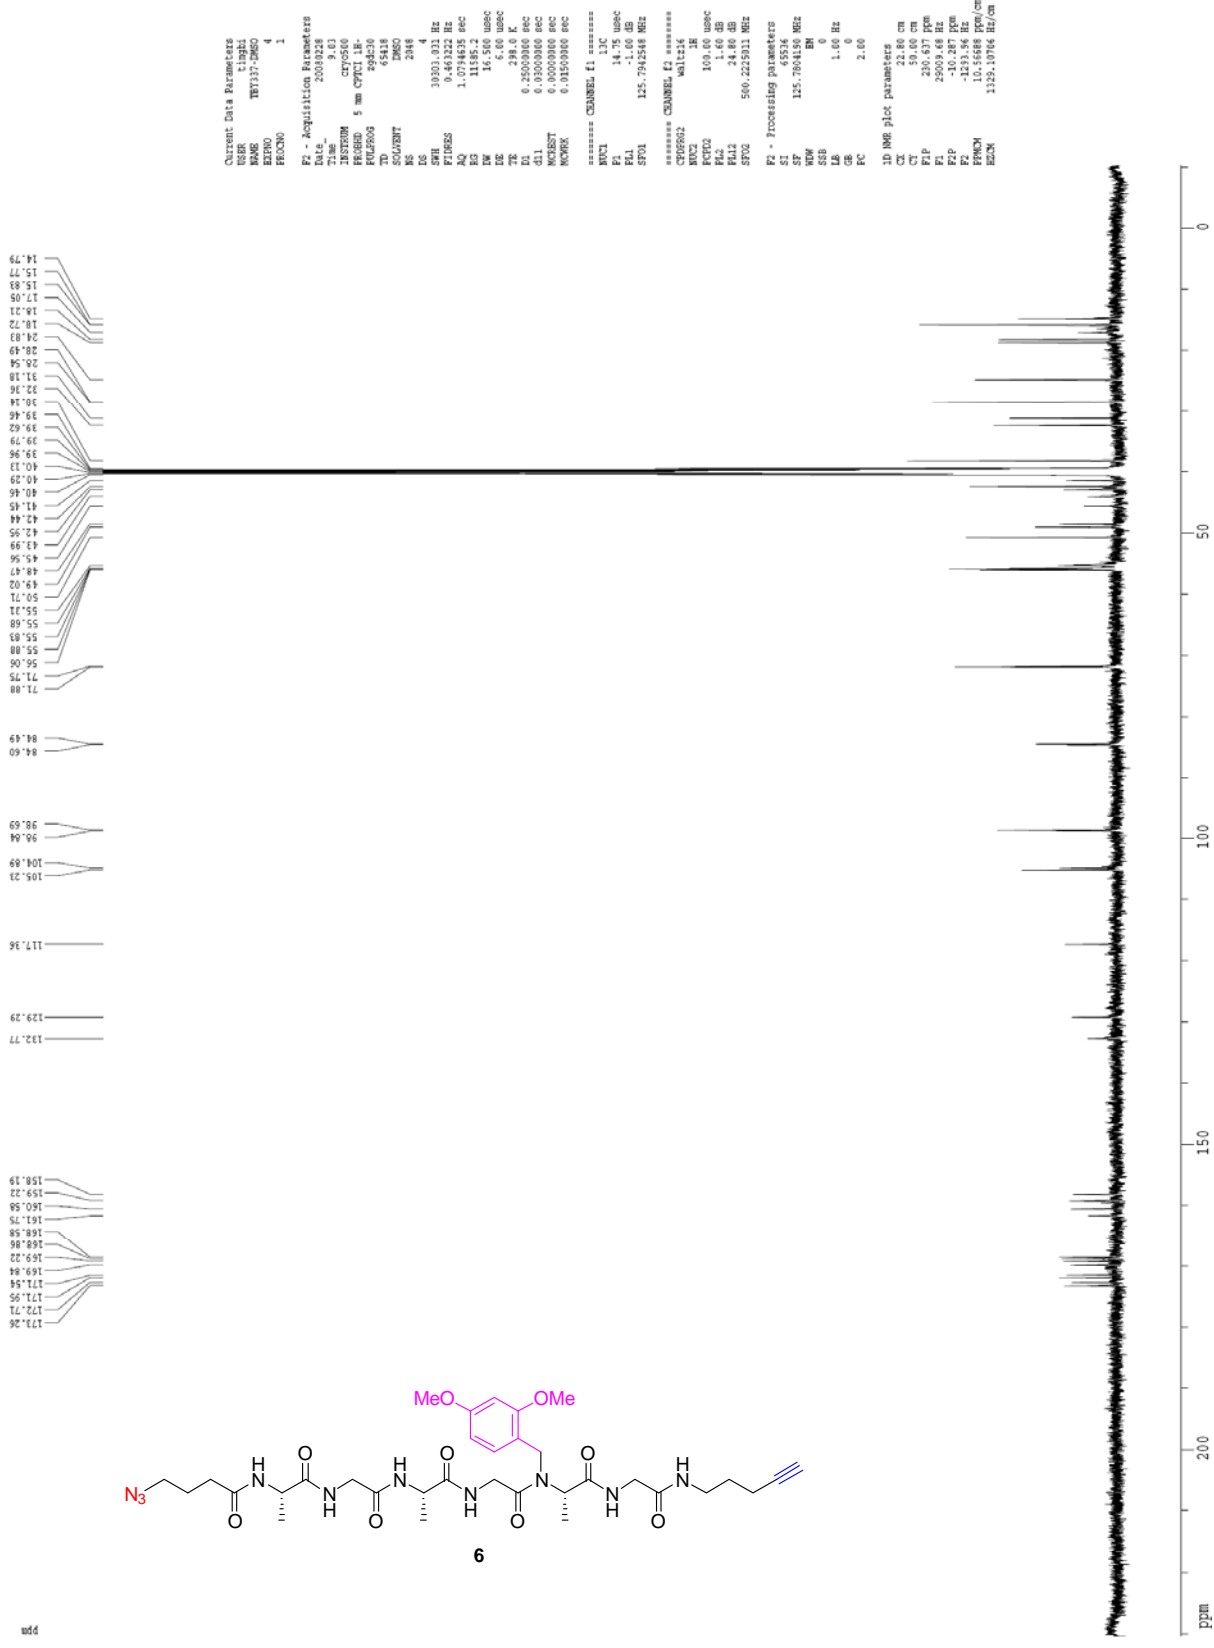

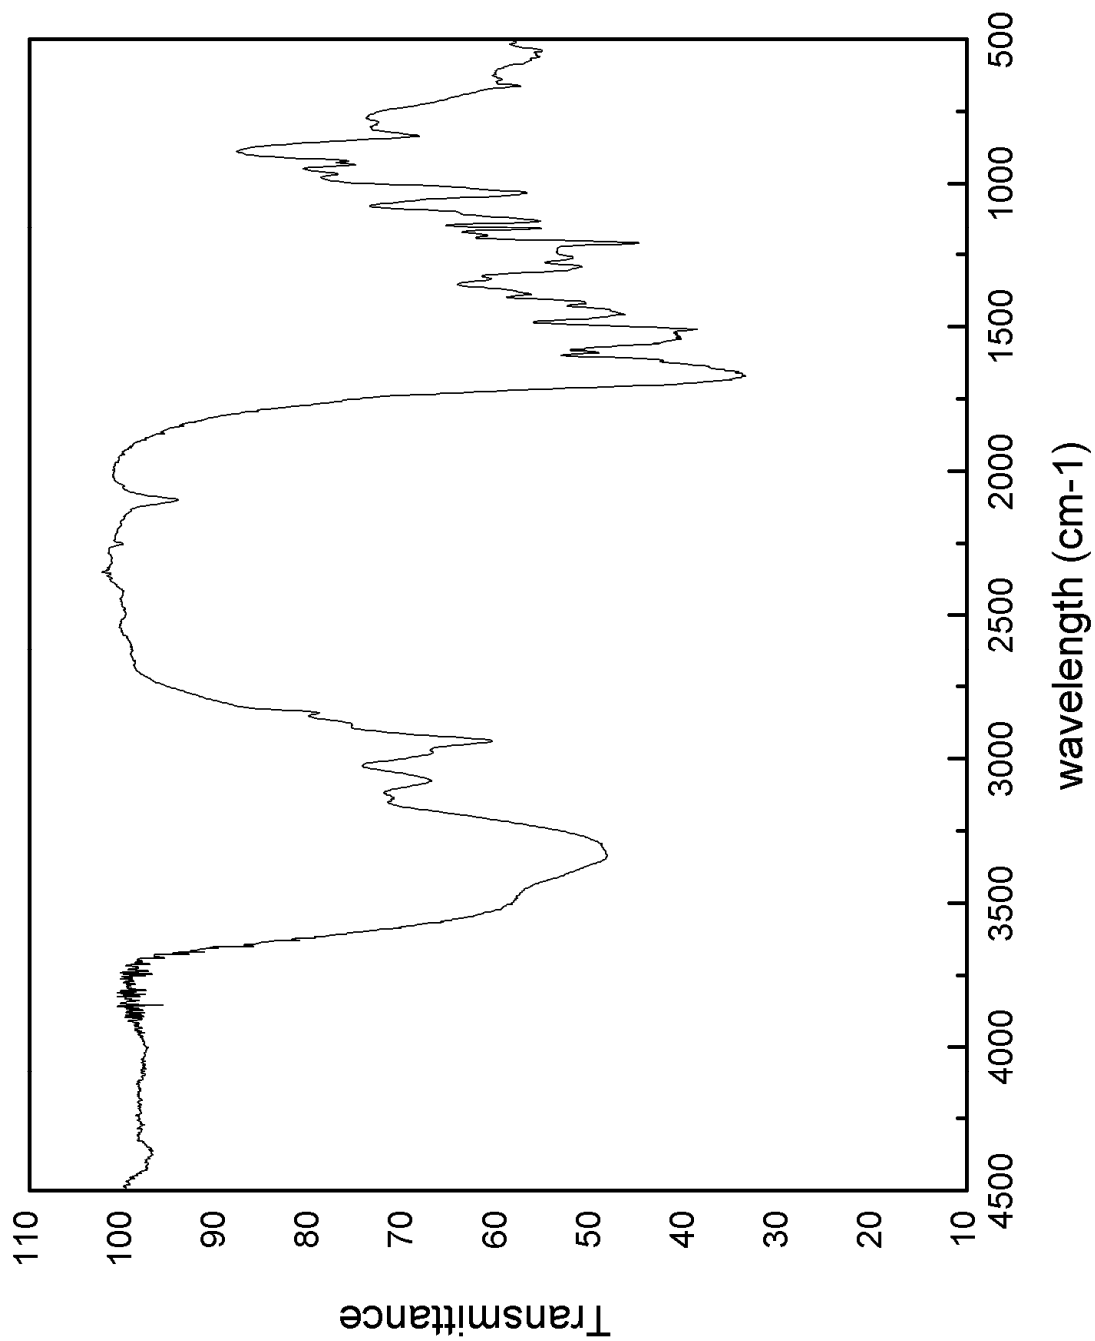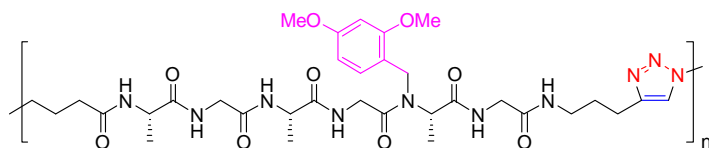

**TBY375-2.5MX10-3M-50%TFA-12h**  
**<sup>1</sup>H spectrum**

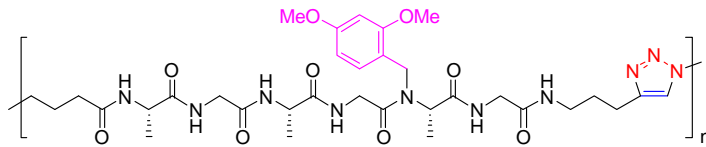

```

Current Data Parameters
NAME      tingdi
EXPNO    1
PROCNO   1
F2 - Acquisition Parameters
Date_    20080222
Time     9.09
INSTRUM  cryo1
PROBHD   5 mm CPYCH-1H
PULPROG  zg30
TD        81728
SOLVENT  DMSO
NS        81
DS        4
SWH       8012.820 Hz
FIDRES    0.098043 Hz
AQ         5.098874 sec
RG         6.3
AQ         62.400 uS
TE         298.0 K
D1         0.10000000 sec
MCRET     0.00000000 sec
MCWREK    0.01500000 sec
----- CHANNEL f1 -----
NUC1       1H
P1         7.38 uS
PL1        1.60 dB
SFO1       500.225015 MHz
F2 - Processing Parameters
SI         500.225015 MHz
SF         500.225015 MHz
RG         6.3
GB         0
GB         0
PC         4.00
  
```

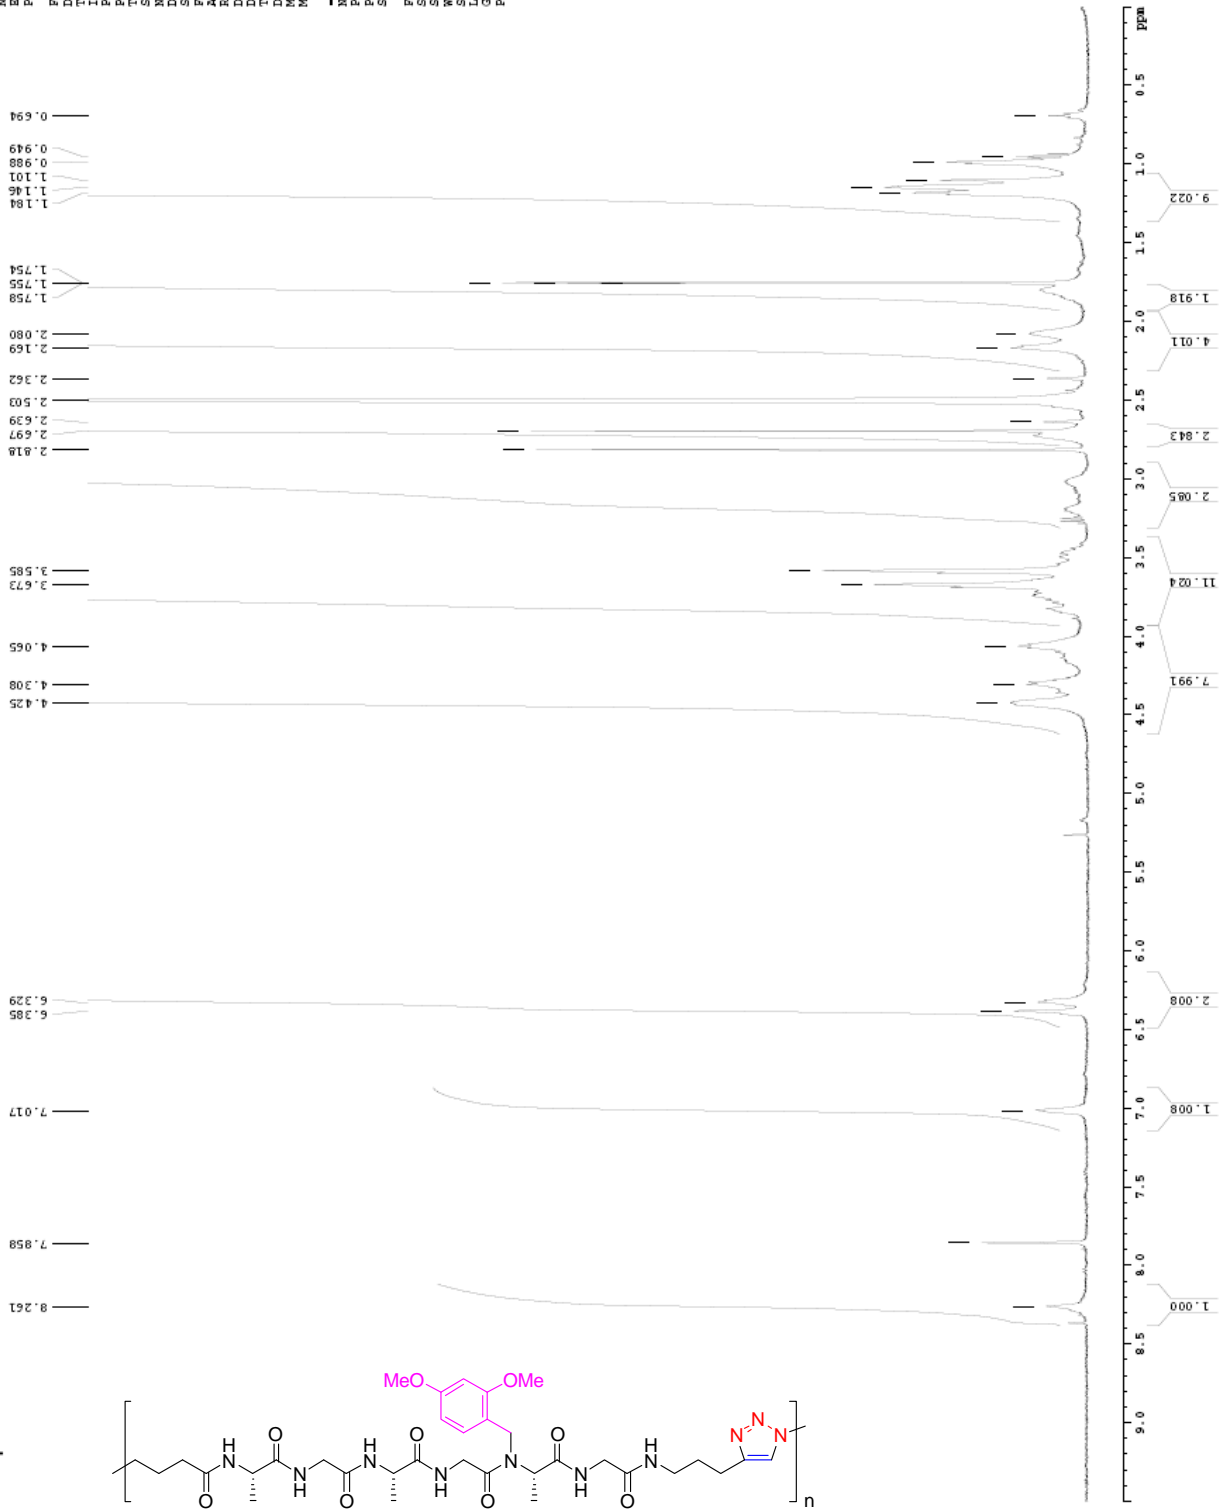

<sup>1</sup>H NMR and IR spectra of **8**

TBY376-TFA:DMSO=6:4-H1  
<sup>1</sup>H spectrum

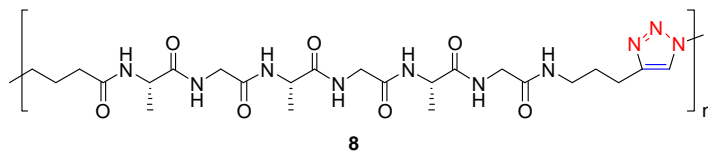

```

Current Data Parameters
=====
USER      tingdi
NAME      TBY376
PROCNO    1
F2 - Acquisition Parameters:
Date_     20080226
TIME      20:56
INSTRUM   CP150
PROBHD    5 mm CPTCI 1H-
PULPROG   zg30
TD        61728
SOLVENT   DMSO
DS         122
SWH        8012.820 Hz
FIDRES     0.098043 Hz
AQ         5.0998774 sec
RG         16
DE         62.400 Ush
TE         298.0 K
D1         0.1000000 sec
MCRETST   0.0000000 sec
MCWPRK    0.0150000 sec
===== CHANNEL f1 =====
NUC1       1H
P1         7.28 Ush
PL         1.61 dB
SFO1       500.225015 MHz
F2 - Processing parameters
SI         500.2200000 MHz
SF         500.1361000 MHz
SSB        0
LB         0.30 Hz
GB         0
PC         4.00
===== LD NMR plot parameters
CX         22.80 cm
CY         150.00 cm
FIP        9.500 DPC
F1         4752.08 Hz
F2         -250.11 Hz
PRMCM      0.43860 DPC
    
```

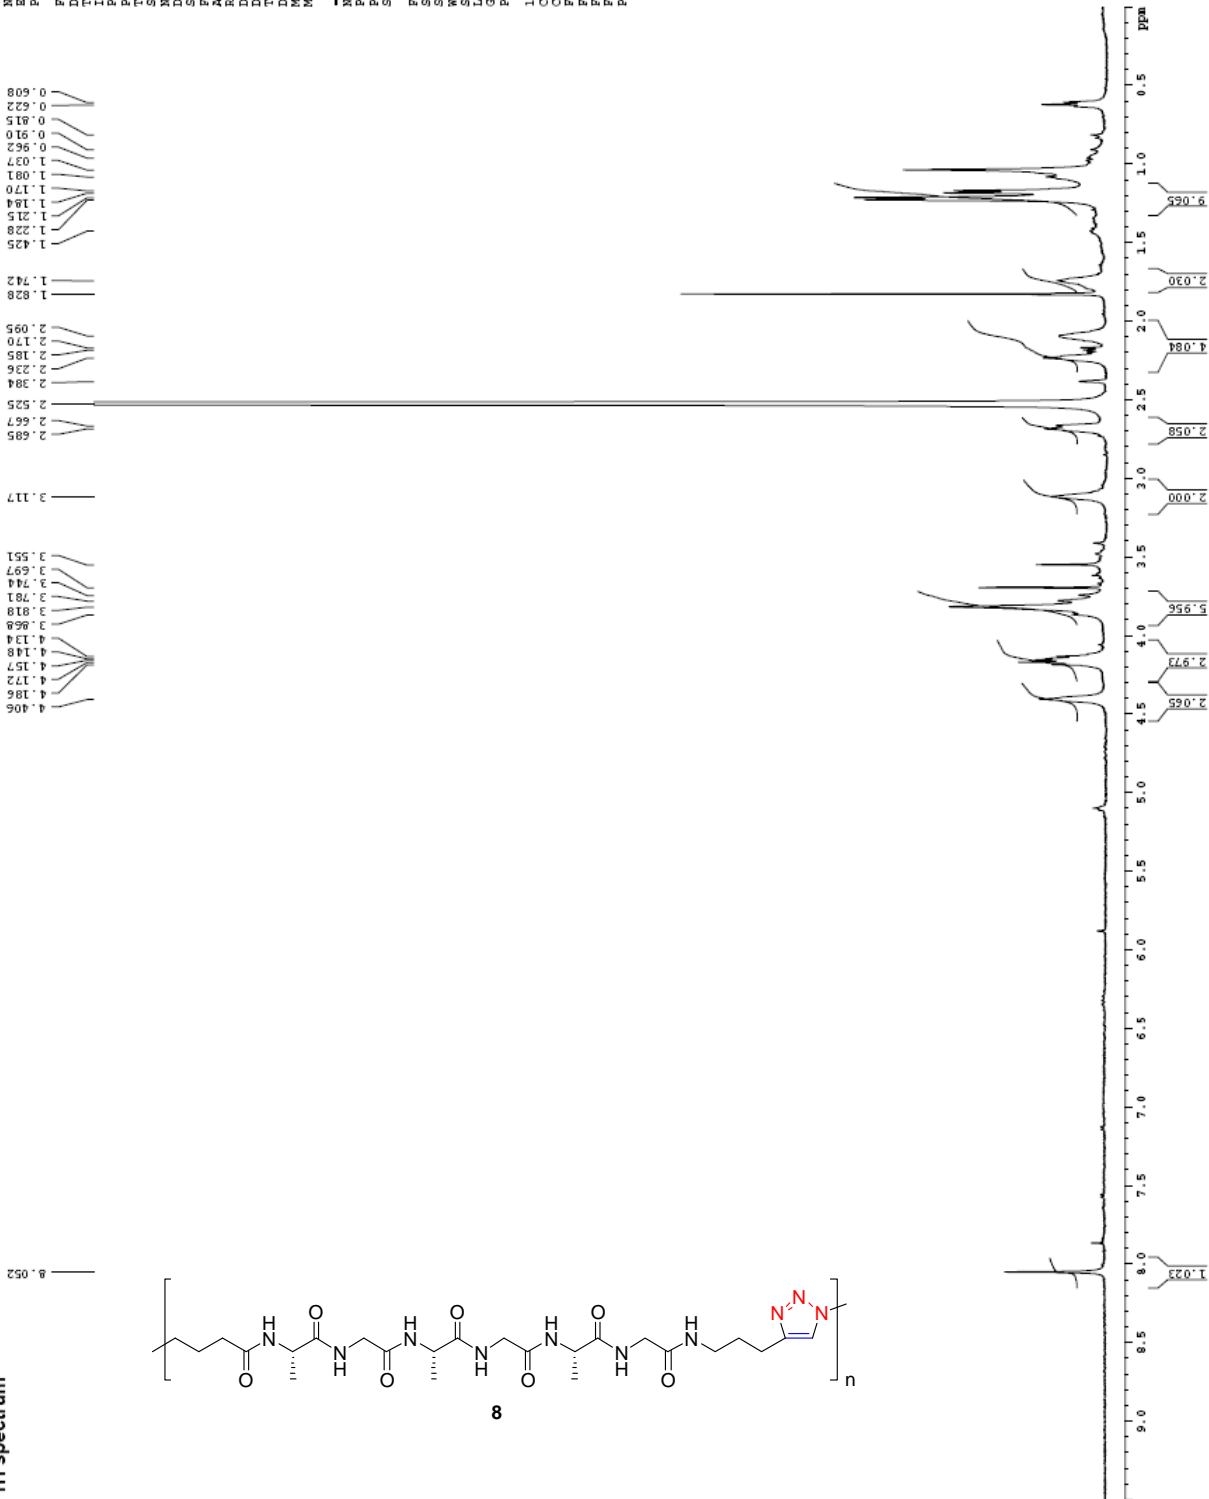

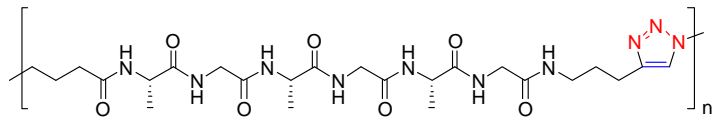

8

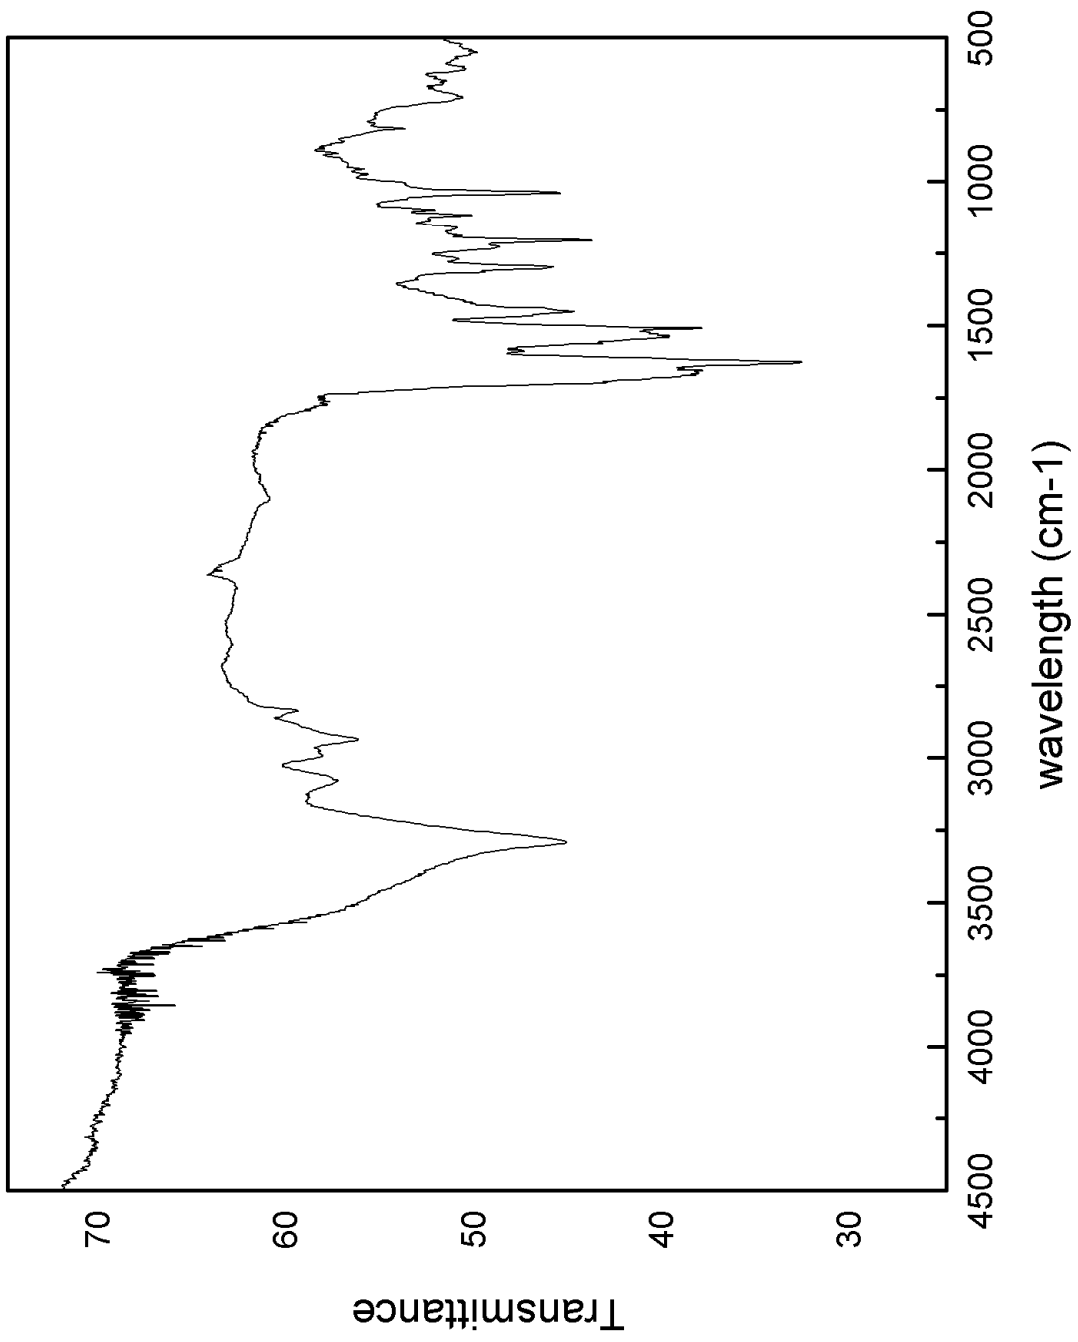















<sup>1</sup>H NMR and <sup>13</sup>C NMR spectra of **13**

1B1329-H1  
1H spectrum

add

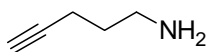

**13**

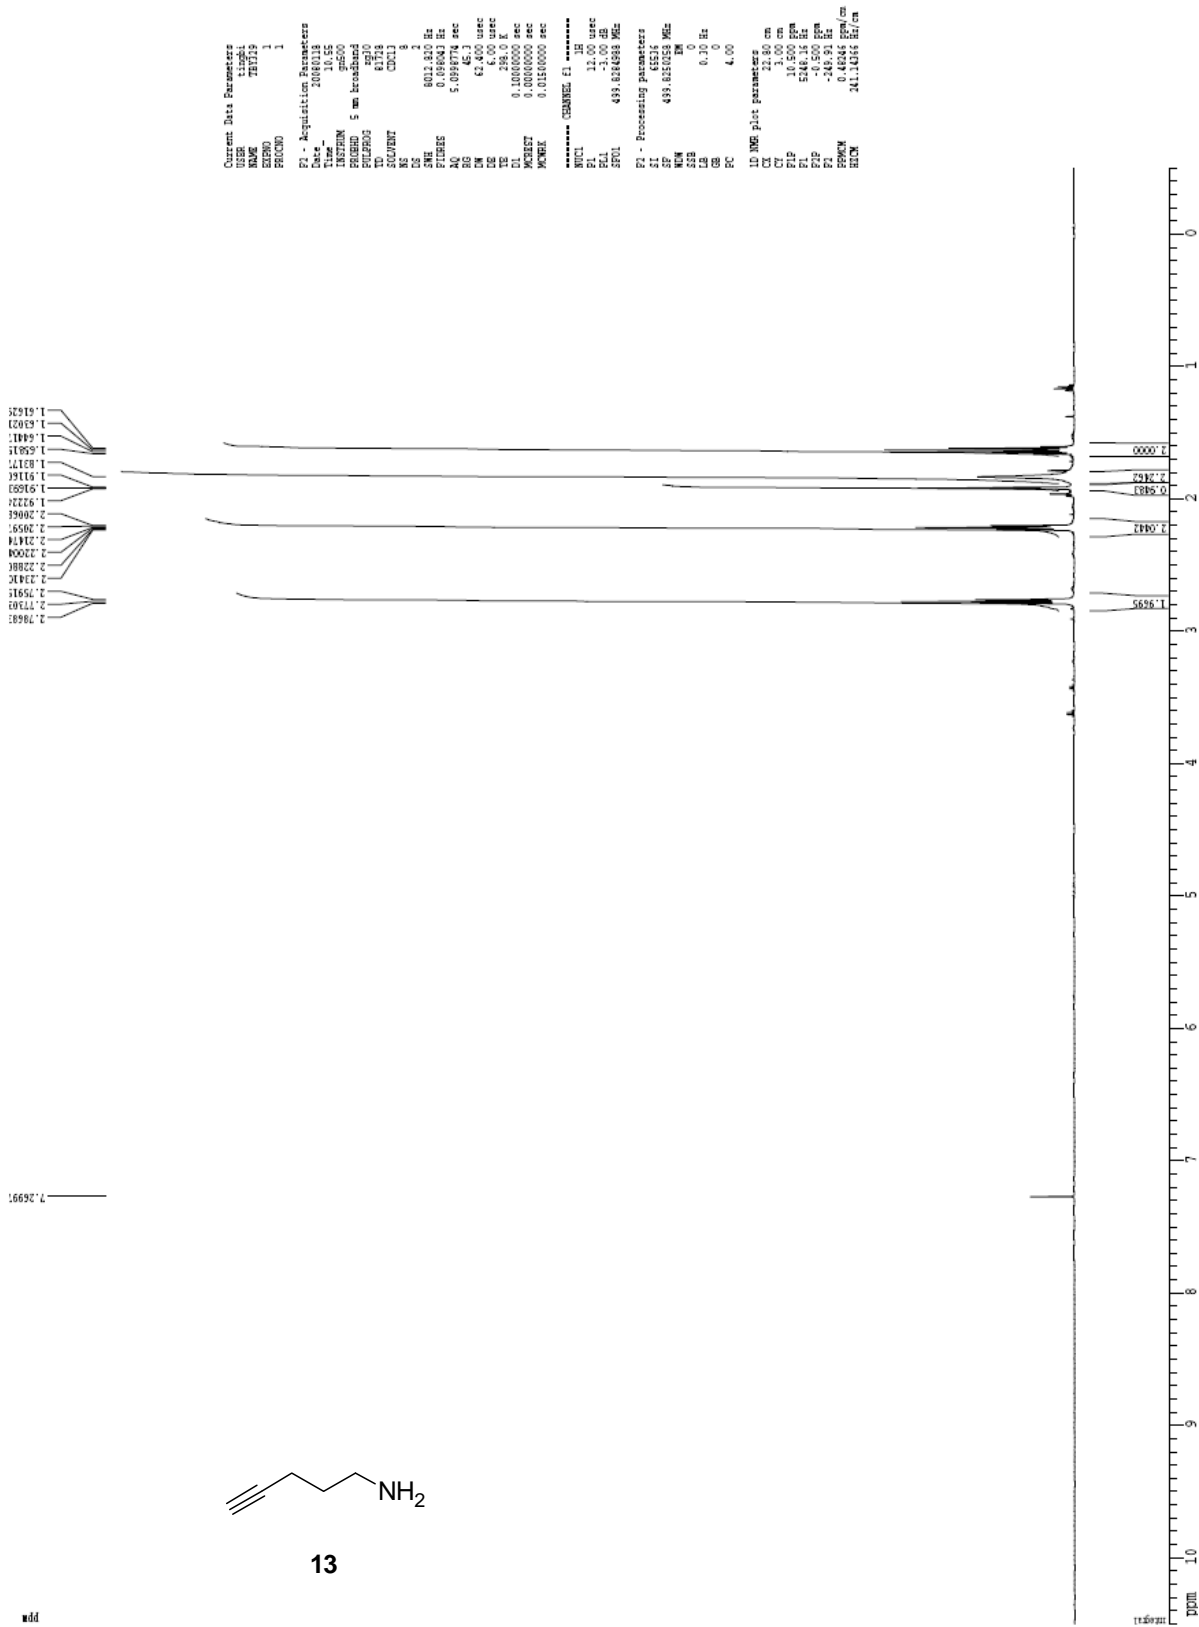

Supplement: NIHMS379129-supplement-supplement_1.pdf [file NIHMS379129-supplement-supplement_1.pdf]
